# Supplementary material for: Phylogenomic analyses based on the plastid genome and concatenated nrDNA sequence data reveal cytonuclear discordance in genus Atractylodes (Asteraceae: Carduoideae)
Source: PubMed Central journal article supplement (PMC9752137; doi:10.3389/fpls.2022.1045423), 2022-12-01
Supplement: DataSheet_1.pdf [file DataSheet_1.pdf]

# Supplementary Materials

## Supplementary Figures

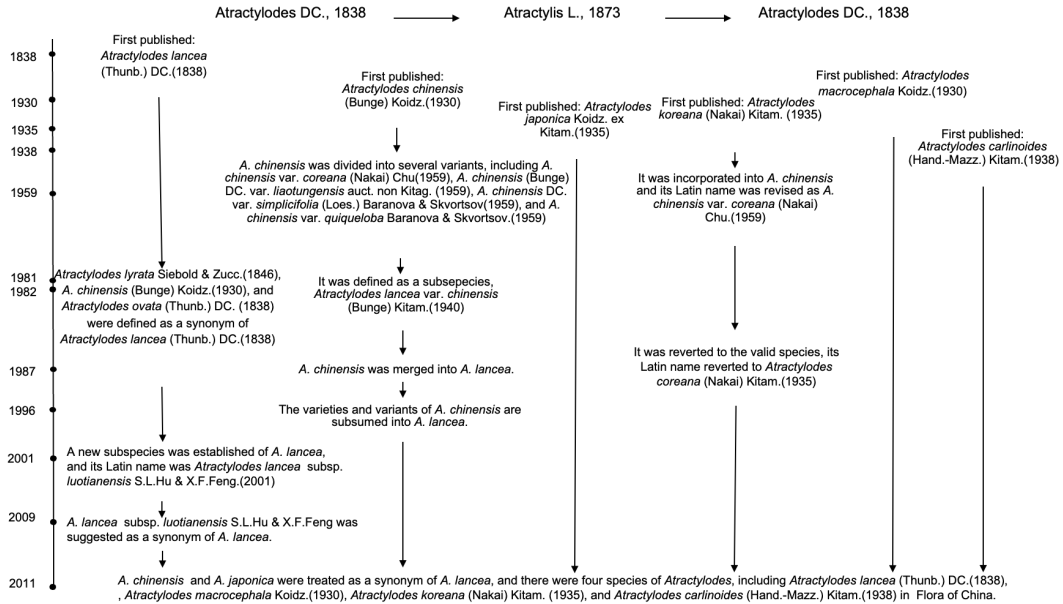

Supplementary Figure 1. The nomenclatural history of the *Atractylodes* species.

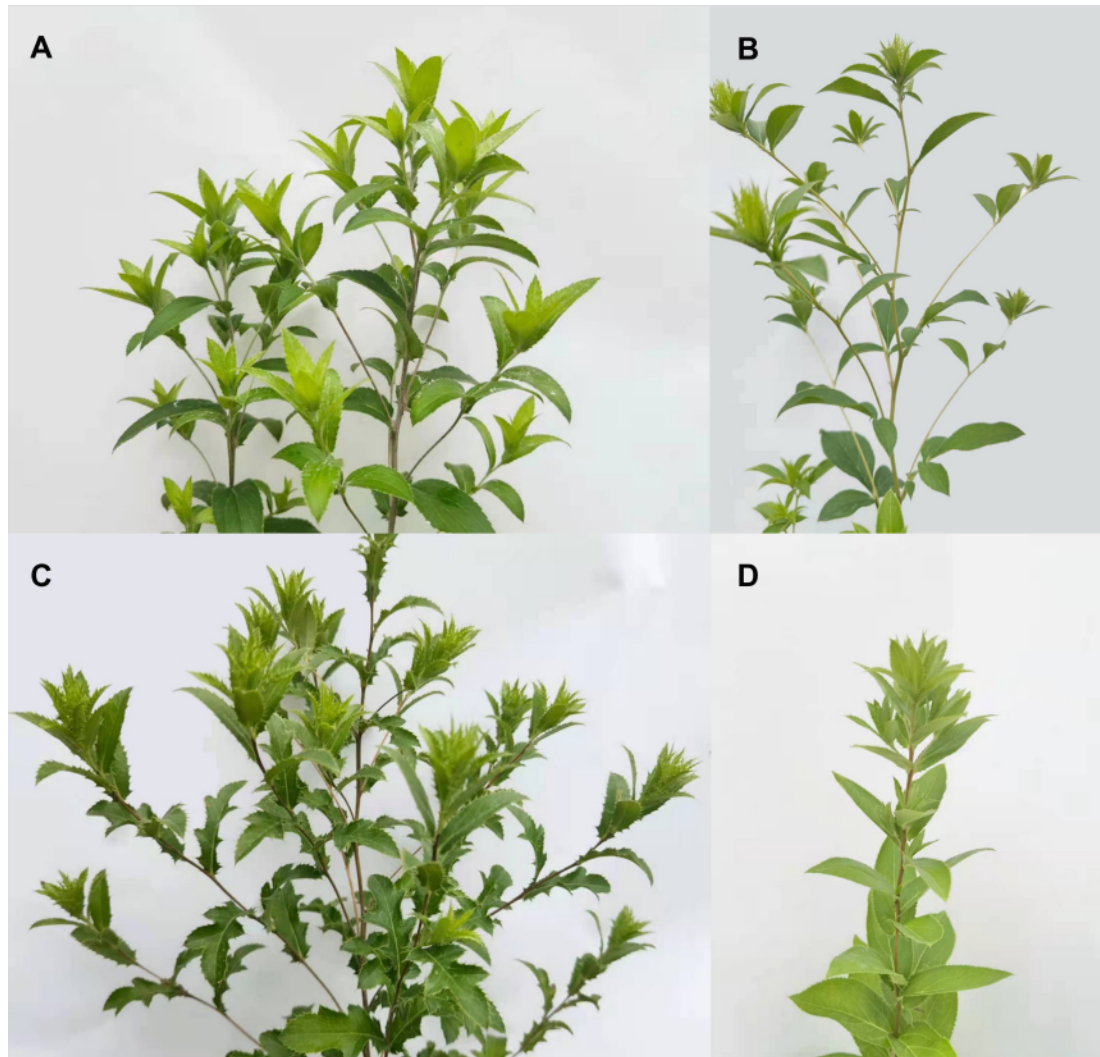

**Supplementary Figure 2.** The origin plants of the *Atractylodes lancea* complex species. A: *A. lancea*, B: *A. japonica*, C: *A. chinensis*, D: *A. koreana*.

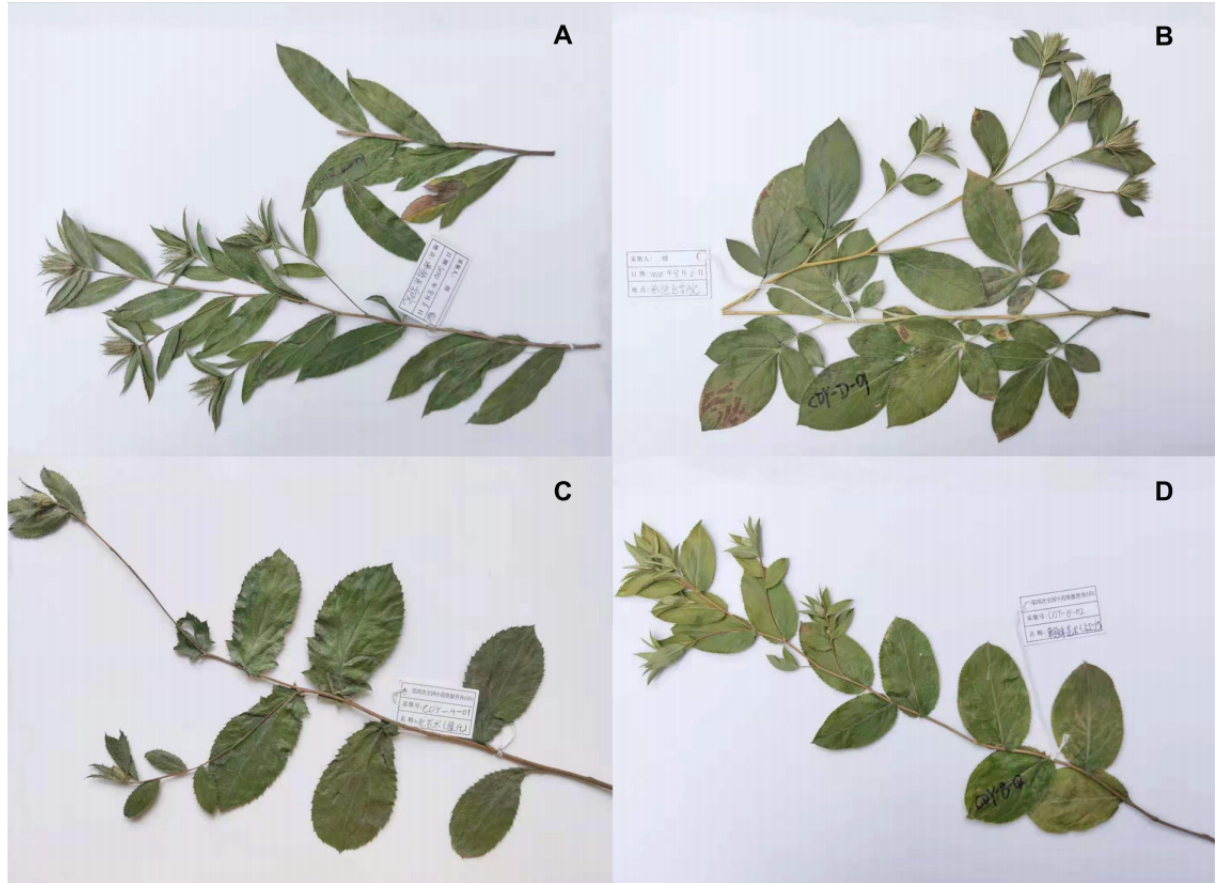

**Supplementary Figure 3.** The specimens of the *Atractylodes lancea* complex species. A: *A. lancea*, B: *A. japonica*, C: *A. chinensis*, D: *A. koreana*.

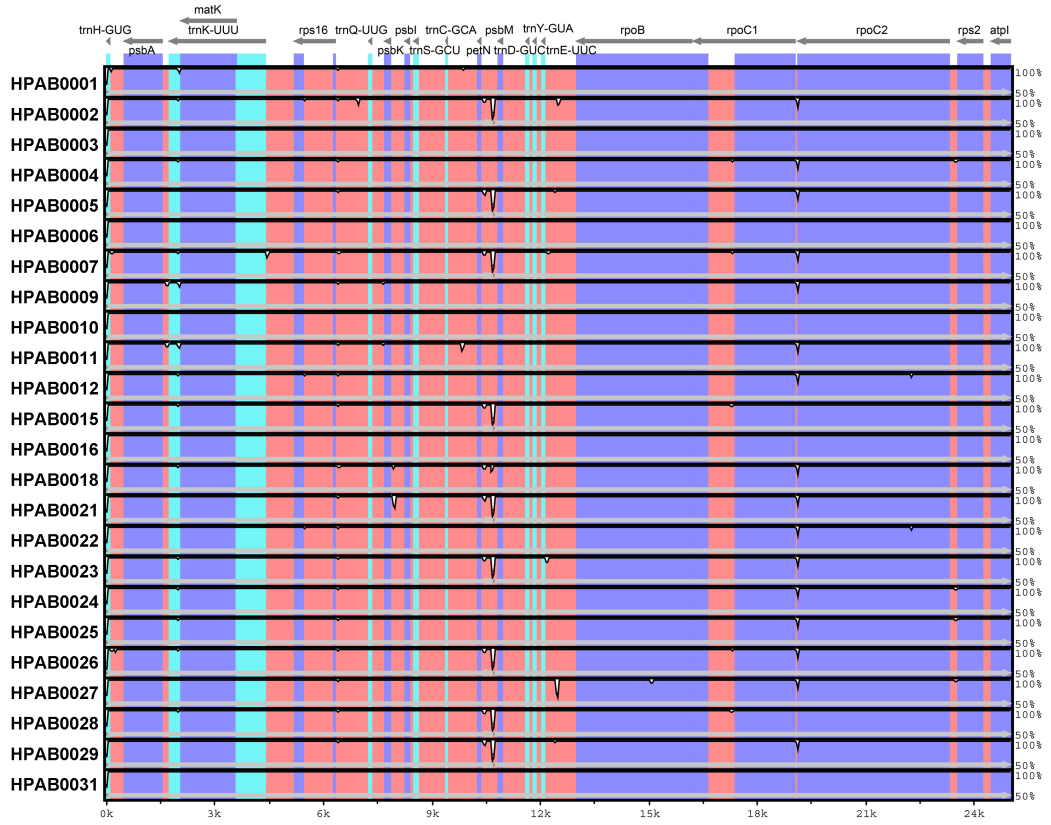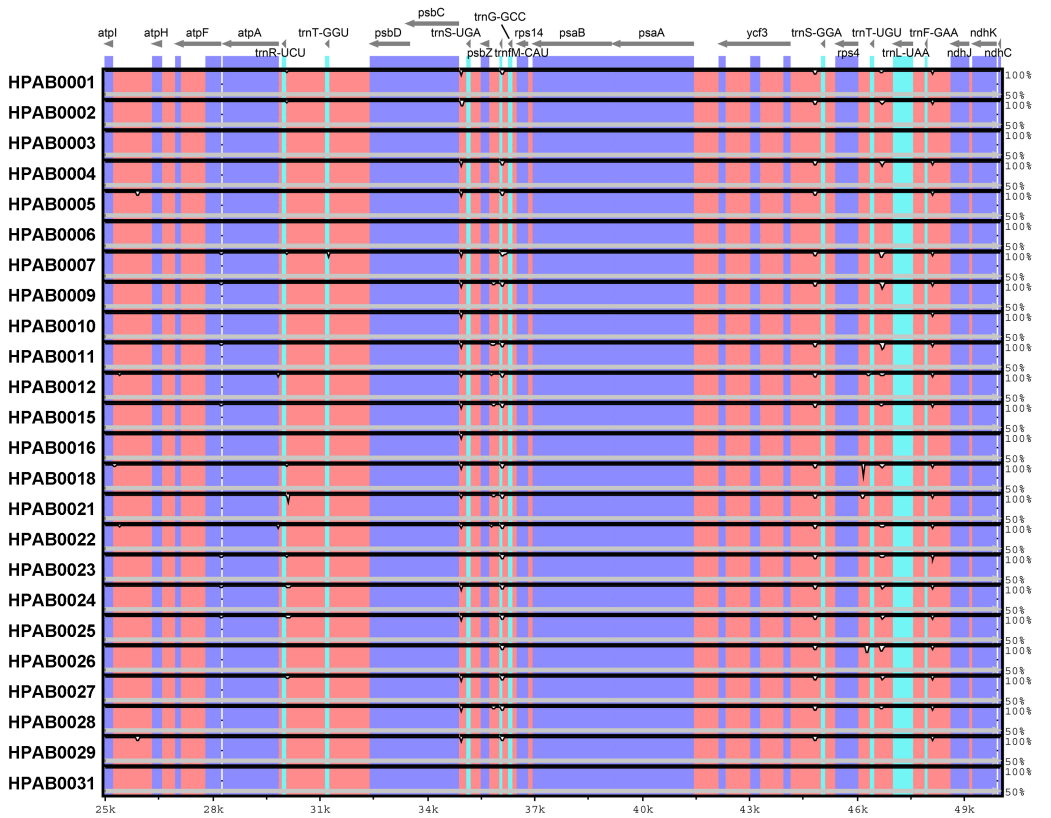

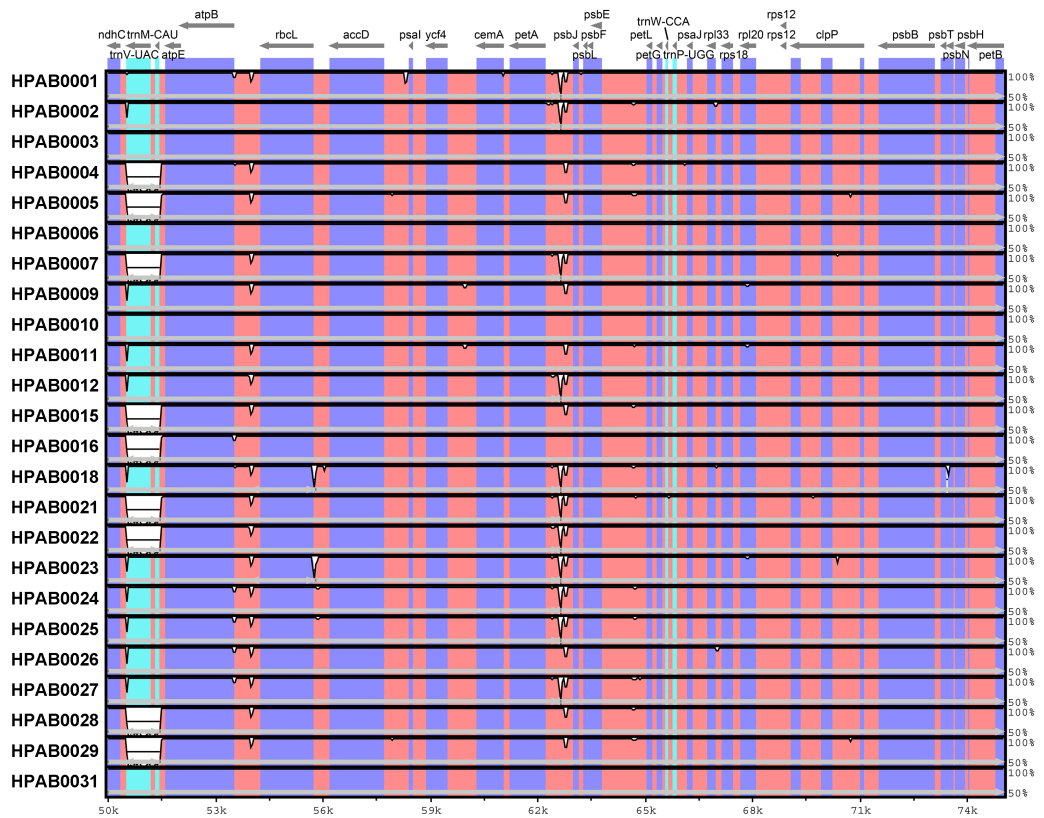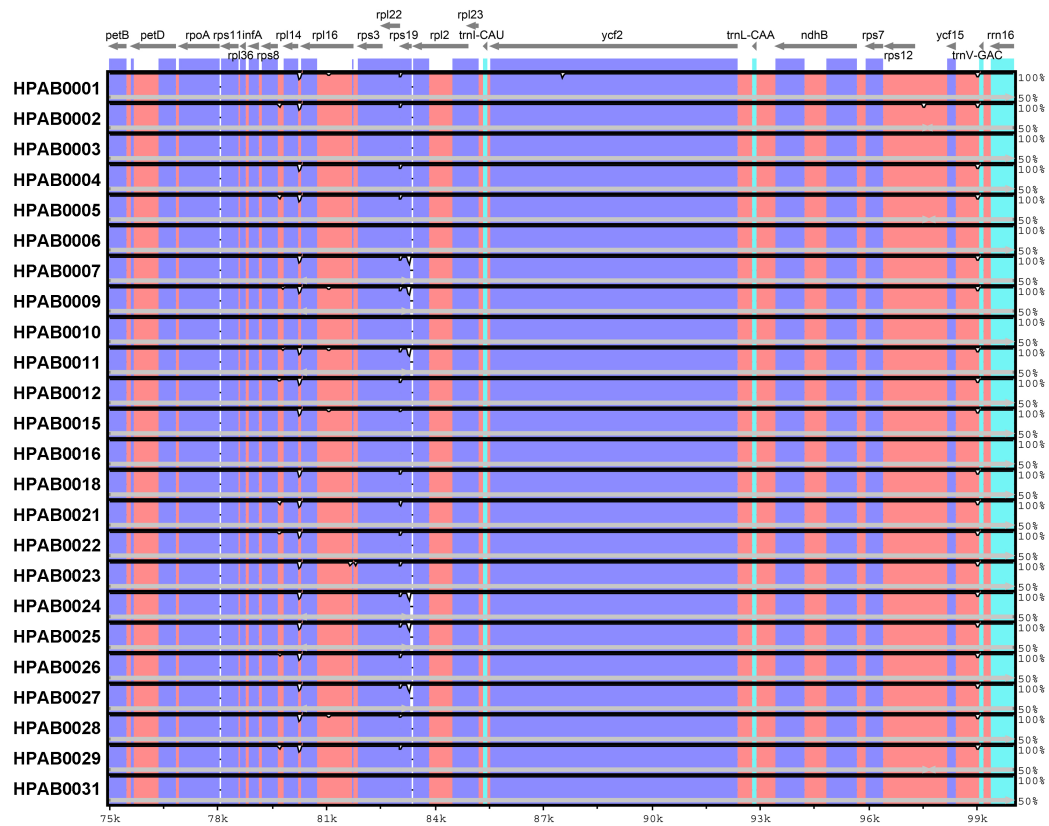

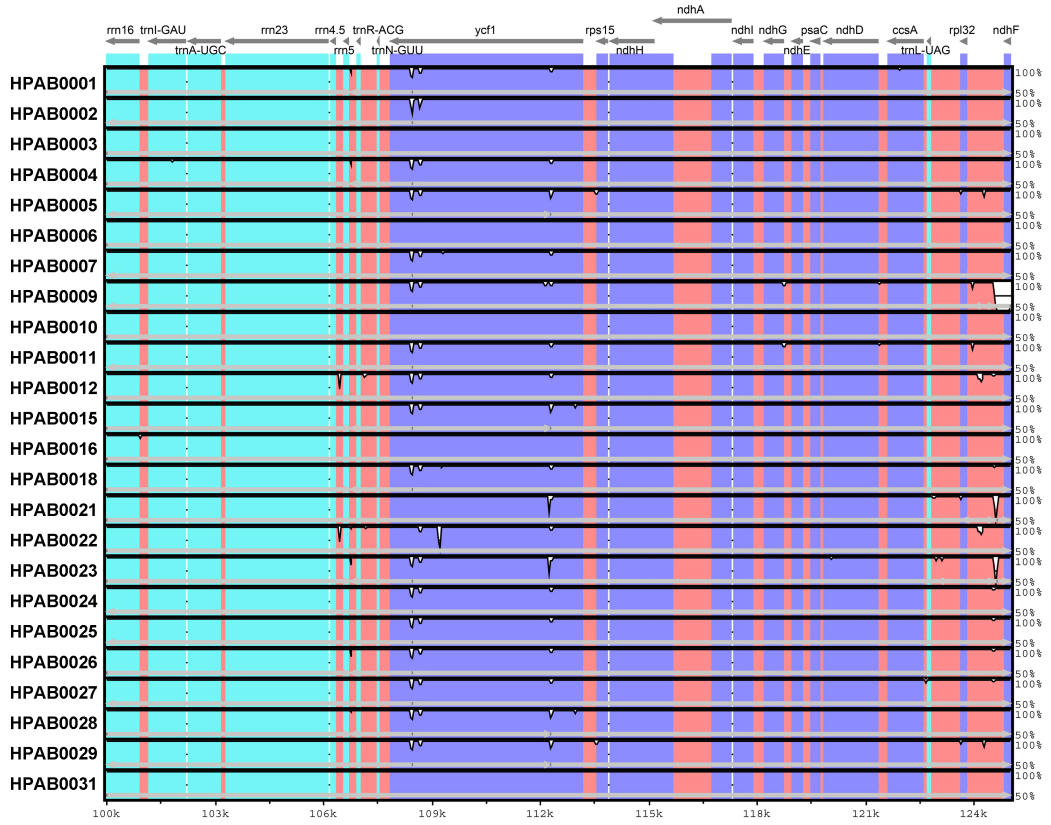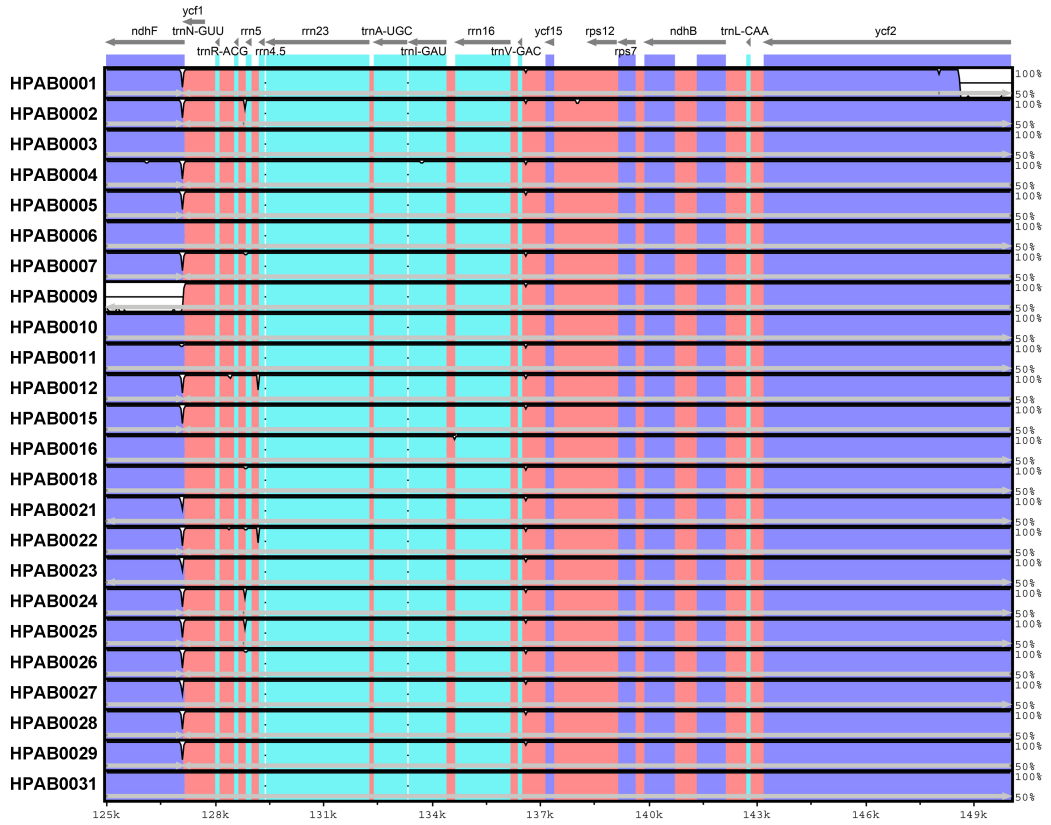

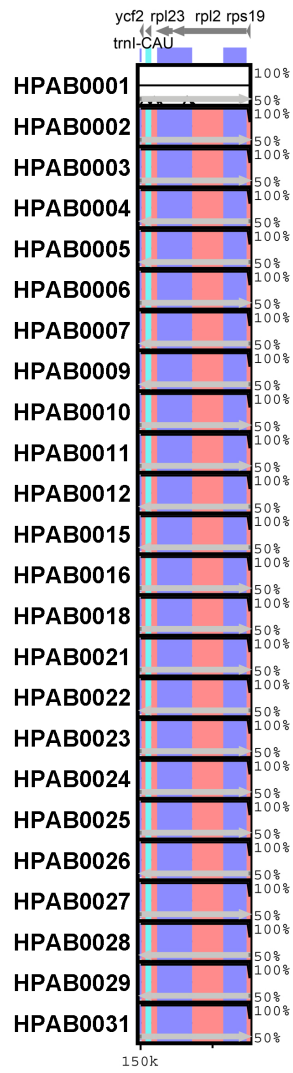

**Supplementary Figure 4.** A comparison between the 24 plastid genomes, with *A. chinensis* as a reference, using the mVISTA alignment program.

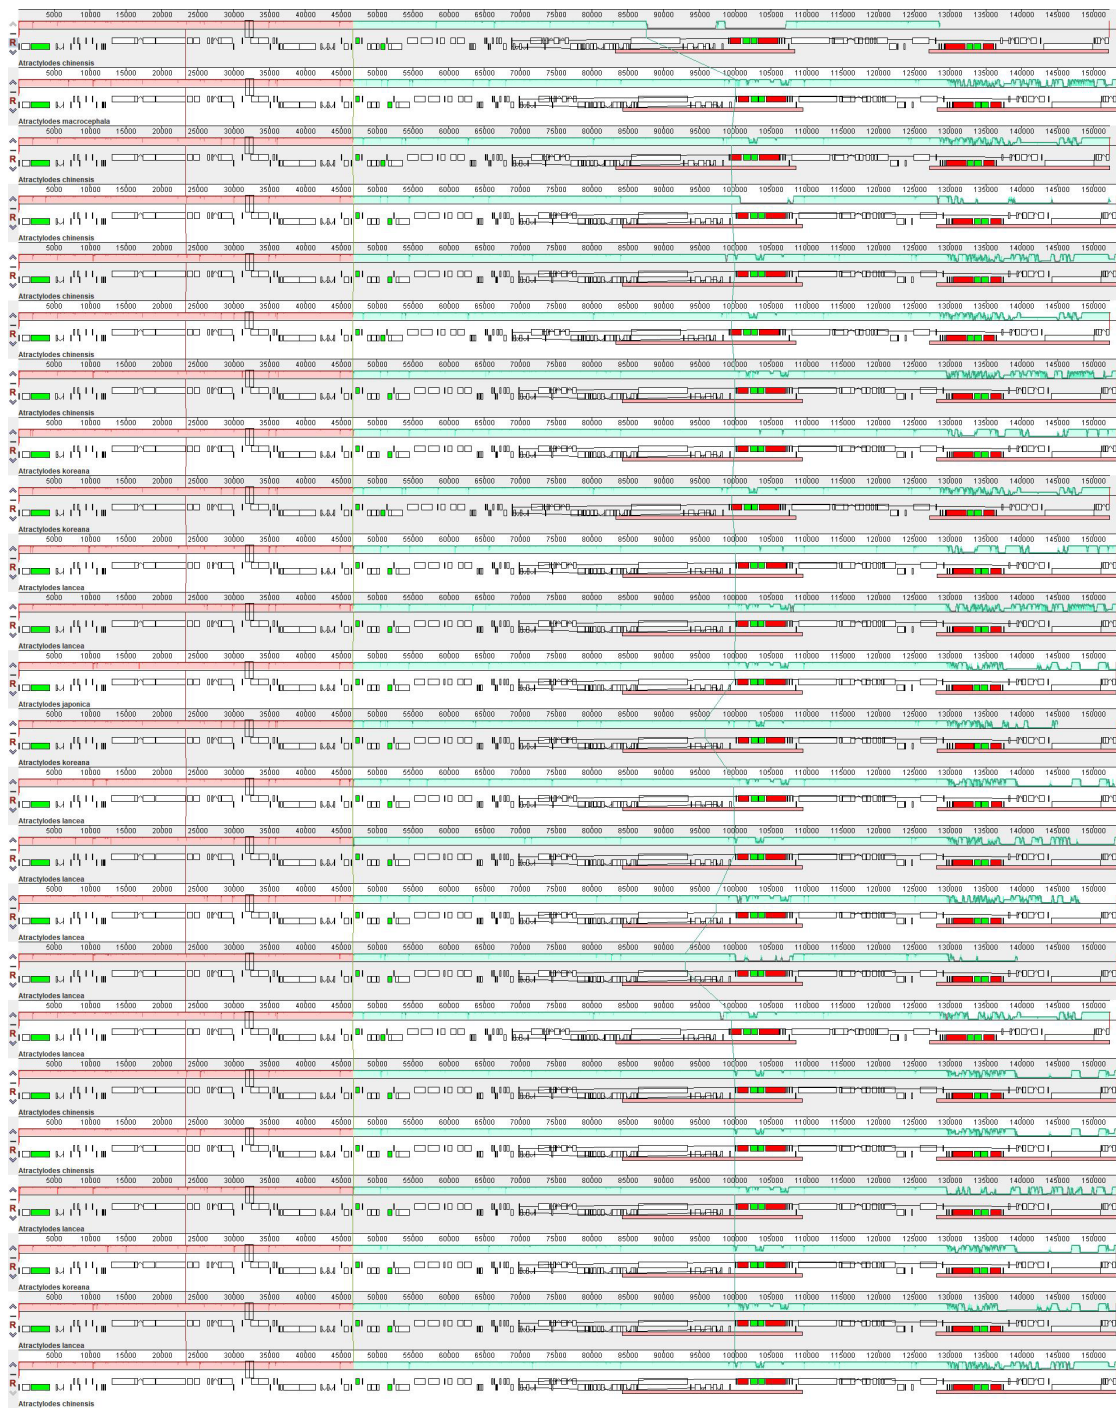

**Supplementary Figure 5.** A comparison between the whole plastid genomes of the *Atractylodes* species using the Mauve algorithm. The red LCBs indicate syntenic regions, while the histograms within each block represent the degree of sequence similarity. The rRNA, protein-coding, and tRNA gene annotations are denoted by the red, white, and green boxes, respectively.



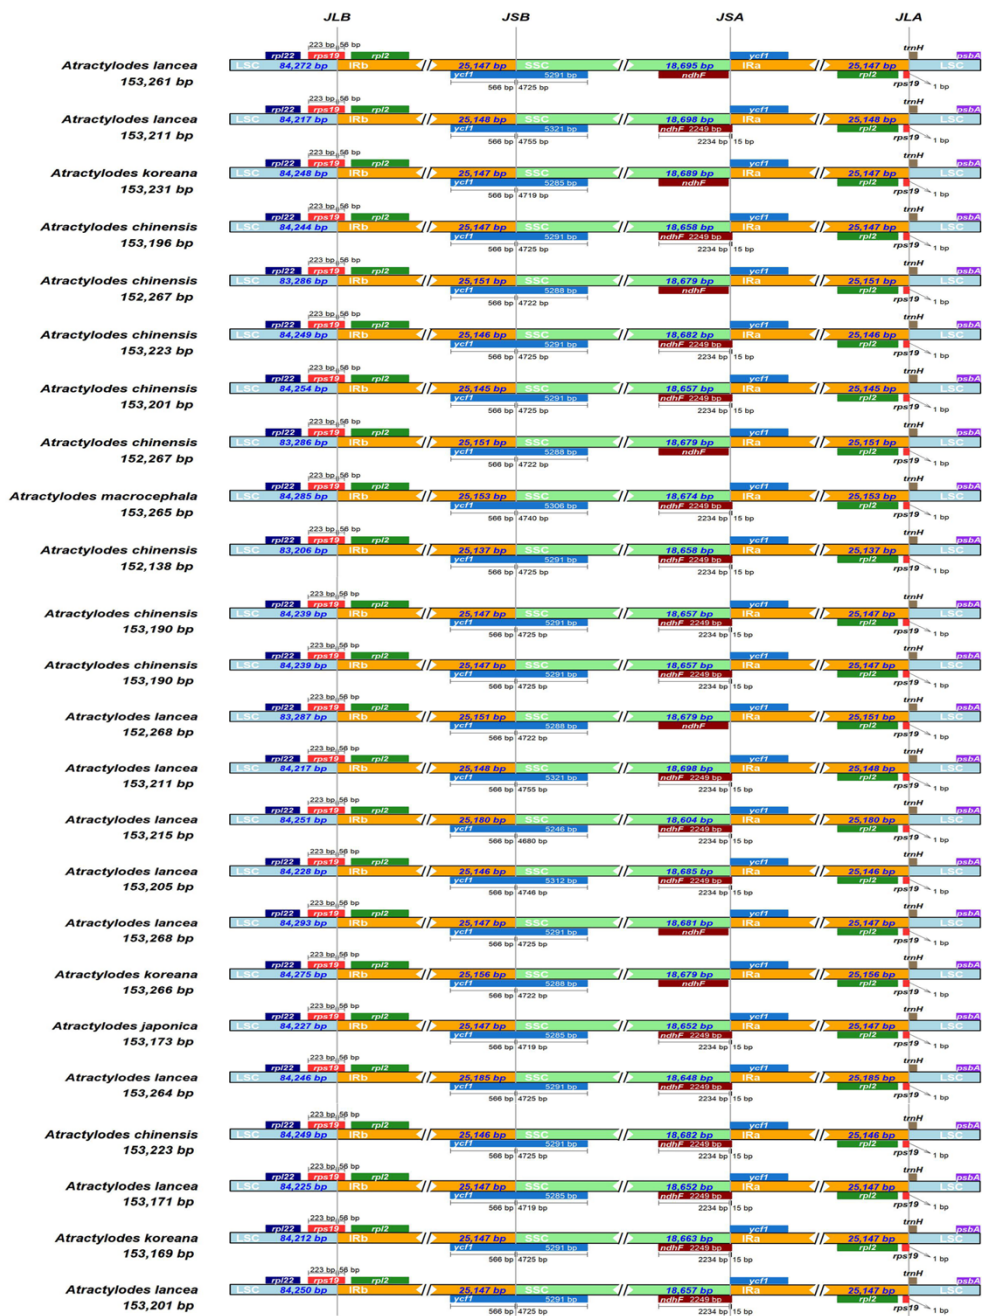

Supplementary Figure 6. A comparison of the LSC and IRb border region, as well as SSC and IRa border region for the five *Atractylodes* species. JLB: junction of LSC and IRb; JSA: junction of SSC and IRa.

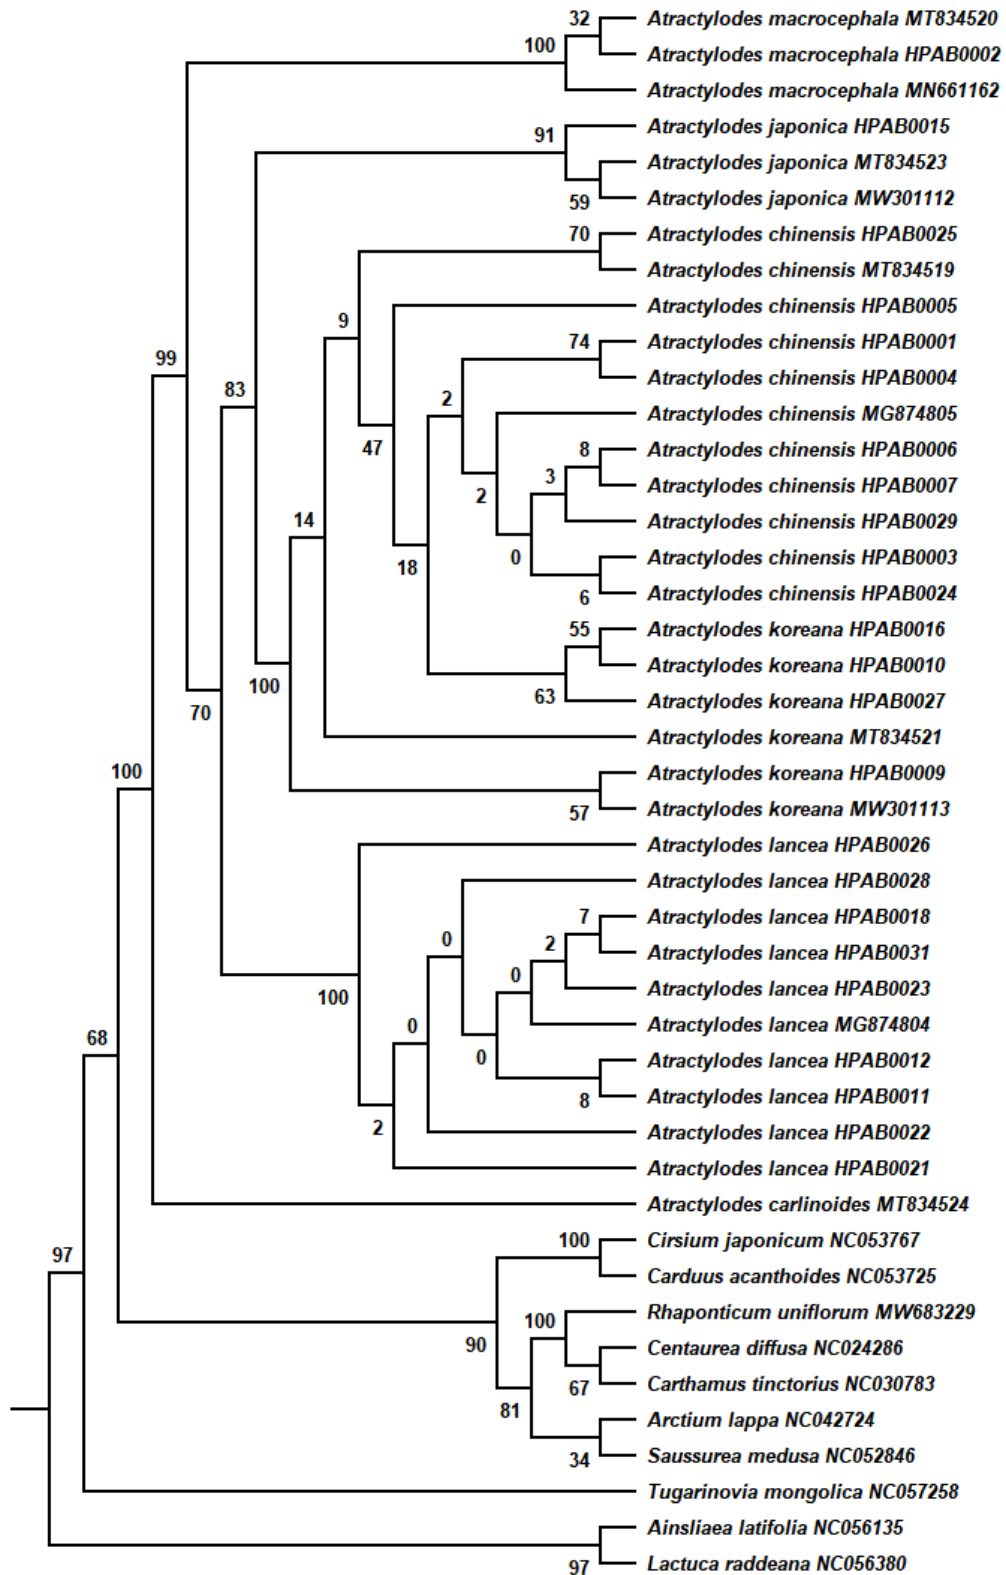

**Supplementary Figure 7.** The phylogenetic tree constructed using the ML based on the concatenated nrDNA sequences. The numbers above the branches represent the ML bootstrap values.

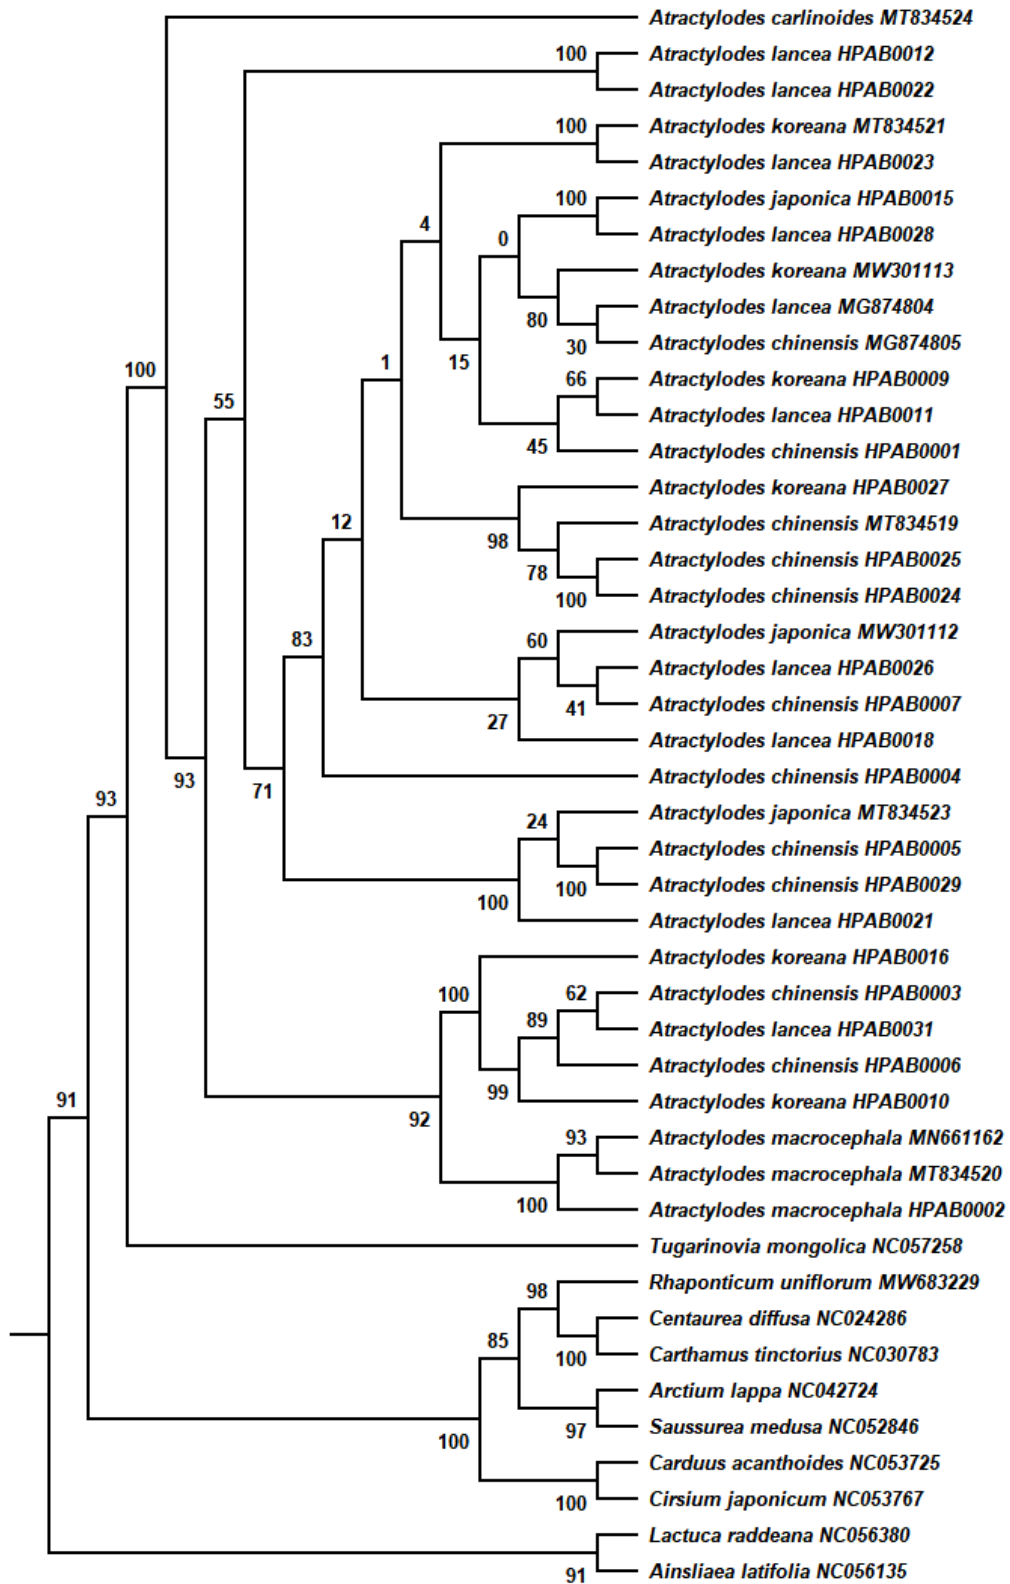

**Supplementary Figure 8.** The phylogenetic tree constructed using the ML based on the whole plastid genomes. The numbers above the branches represent the ML bootstrap values.

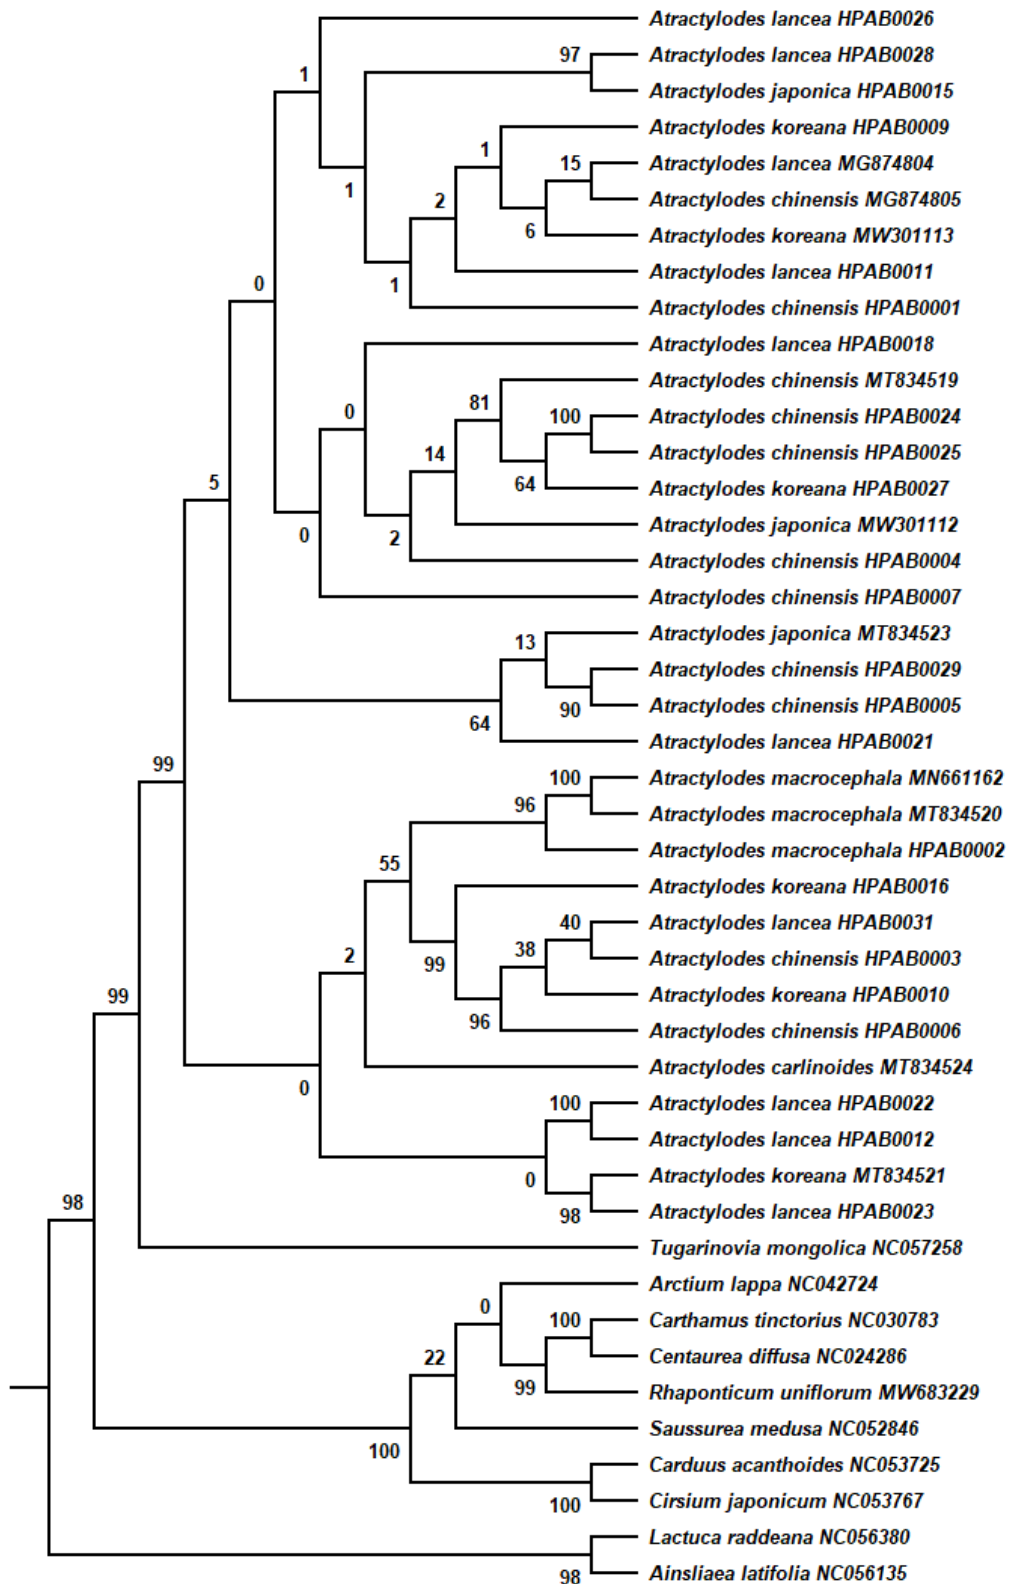

**Supplementary Figure 9.** The phylogenetic tree constructed using the ML based on 73 conserved plastid protein-coding genes. The numbers above the branches represent the ML bootstrap values.

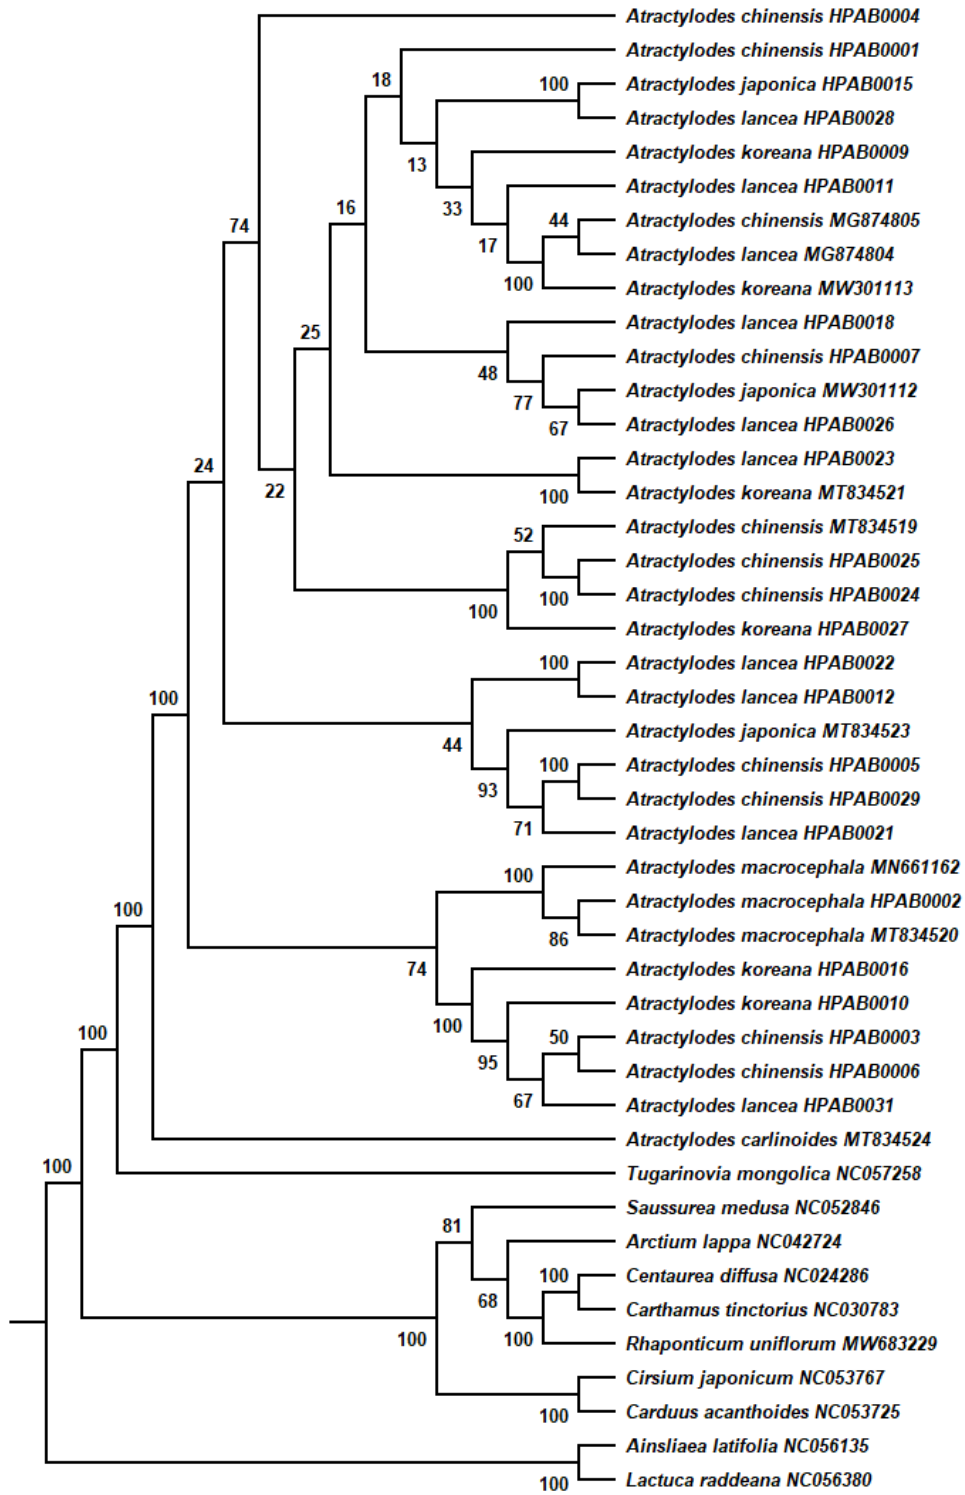

**Supplementary Figure 10.** The phylogenetic tree constructed using the ML based on 88 IGS regions. The numbers above the branches represent the ML bootstrap values.

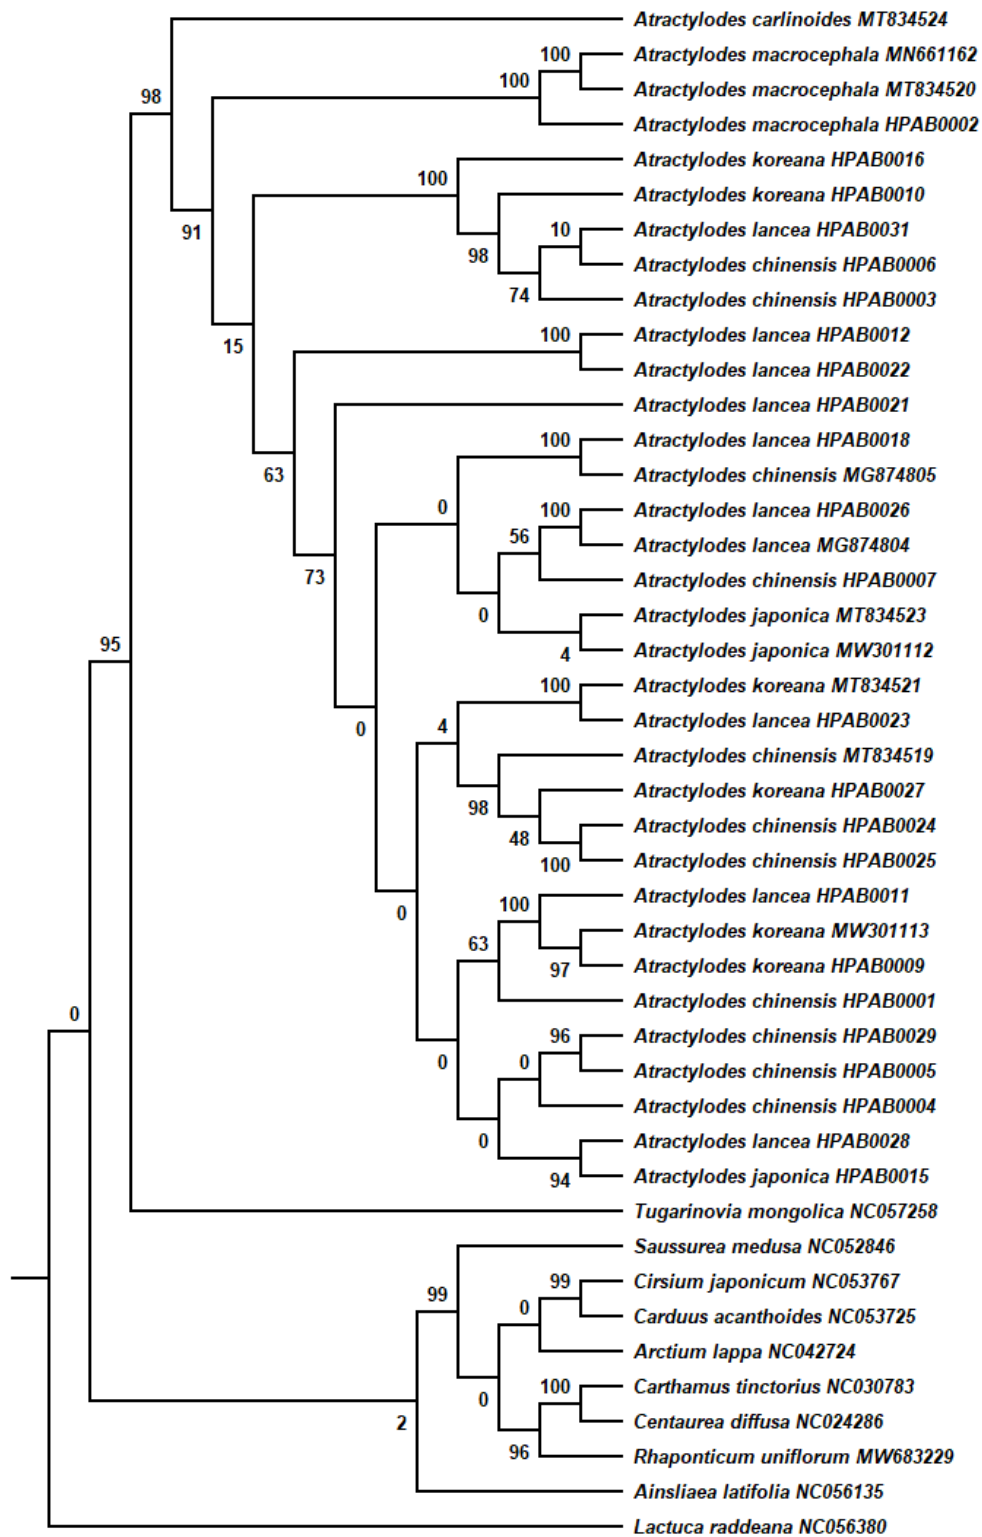

**Supplementary Figure 11.** The phylogenetic tree constructed using the ML based on 95 common genes. The numbers above the branches represent the ML bootstrap values.

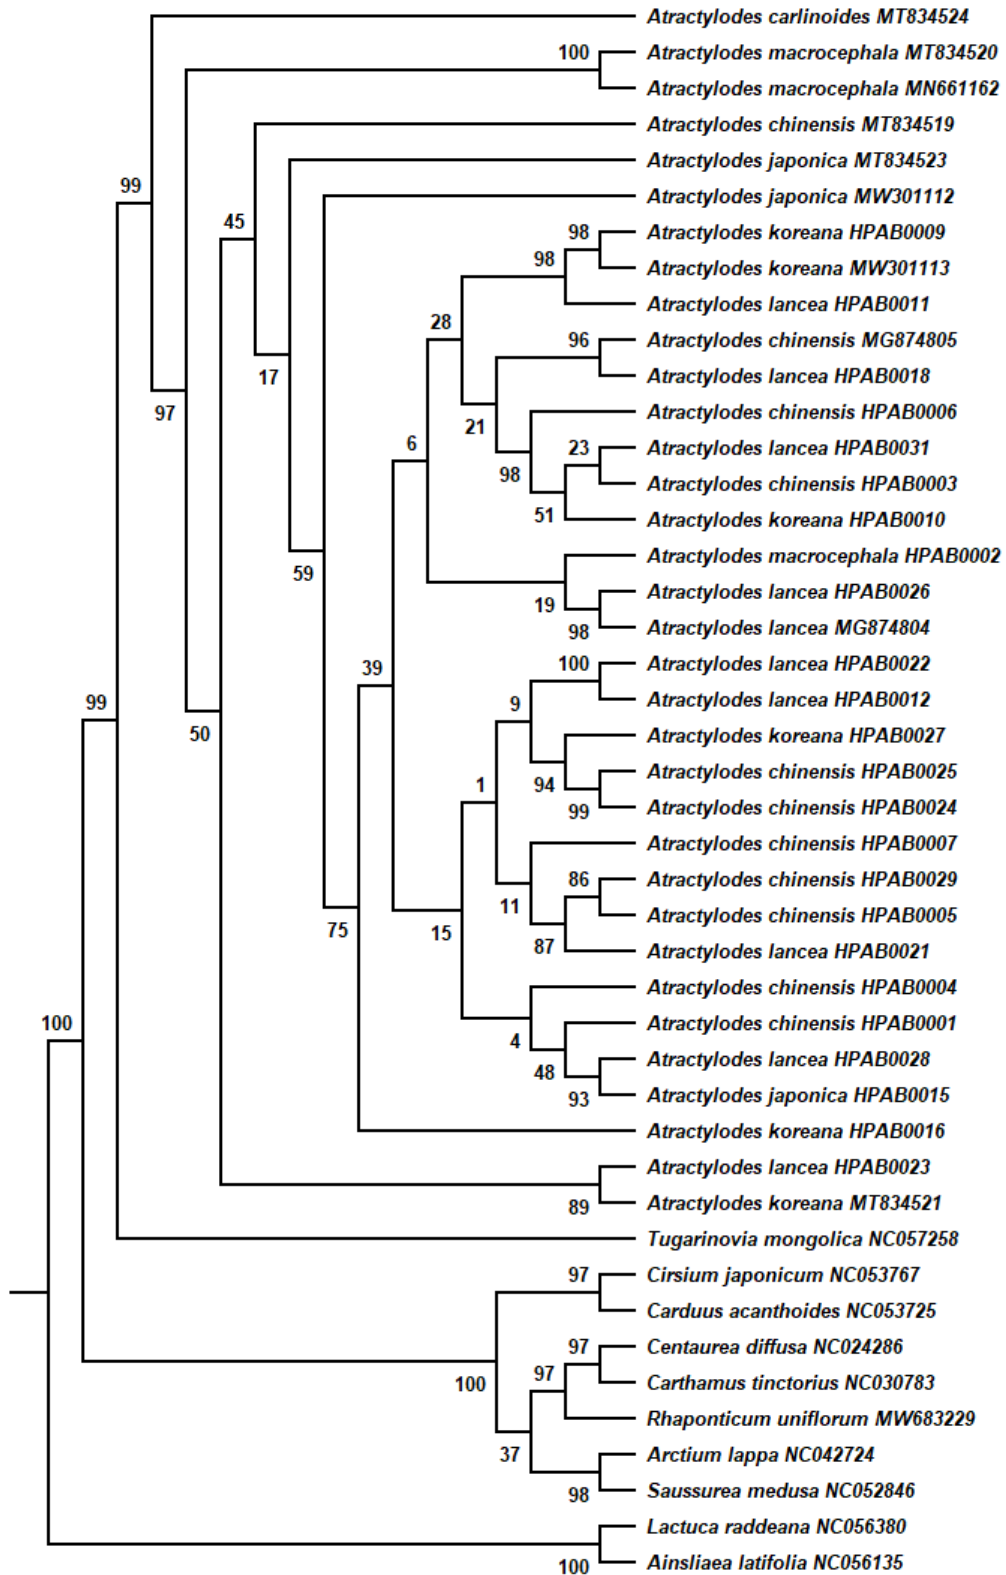

**Supplementary Figure 12.** The phylogenetic tree constructed using the ML based on 73 protein sequences. The numbers above the branches represent the ML bootstrap values.

## Supplementary Tables

**Supplementary Table 1.** The samples information of *Atractylodes* species.

| Source     | Voucher specimen | Species                | Collection locality                | Identifier    | Accession number (chloroplast genome) | Accession number (complete rDNA) |
|------------|------------------|------------------------|------------------------------------|---------------|---------------------------------------|----------------------------------|
|            | HPAB0001         | <i>A. chinensis</i>    | Beijing Medicinal Botanical Garden | Qiuling Wang  | MZ460962                              | MZ456956                         |
|            | HPAB0002         | <i>A. macrocephala</i> | Beijing Medicinal Botanical Garden | Qiuling Wang  | MZ460963                              | MZ456957                         |
|            | HPAB0003         | <i>A. chinensis</i>    | Weichang, Chengde, Hebei           | Qiuling Wang  | MZ460964                              | MZ456958                         |
|            | HPAB0004         | <i>A. chinensis</i>    | Weichang, Chengde, Hebei           | Qiuling Wang  | MZ460965                              | MZ456959                         |
|            | HPAB0005         | <i>A. chinensis</i>    | Weichang, Chengde, Hebei           | Qiuling Wang  | MZ460966                              | MZ456960                         |
|            | HPAB0006         | <i>A. chinensis</i>    | Longhua, Chengde, Hebei            | Chunying Zhao | MZ460967                              | MZ456961                         |
|            | HPAB0007         | <i>A. chinensis</i>    | Longhua, Chengde, Hebei            | Chunying Zhao | MZ460968                              | MZ456962                         |
|            | HPAB0009         | <i>A. koreana</i>      | Shenyang, Liaoning                 | Chunying Zhao | MZ460969                              | MZ456963                         |
|            | HPAB0010         | <i>A. koreana</i>      | Shenyang, Liaoning                 | Chunying Zhao | MZ460970                              | MZ456964                         |
| This study | HPAB0011         | <i>A. lancea</i>       | Mao shan, Jurong, Jiangsu          | Chunying Zhao | MZ460971                              | MZ456965                         |
|            | HPAB0012         | <i>A. lancea</i>       | Mao shan, Jurong, Jiangsu          | Chunying Zhao | MZ460972                              | MZ456966                         |
|            | HPAB0015         | <i>A. japonica</i>     | Shenyang, Liaoning                 | Chunying Zhao | MZ460975                              | MZ456969                         |
|            | HPAB0016         | <i>A. koreana</i>      | Donggang, Dandong, Liaoning        | Qiuling Wang  | MZ460976                              | MZ456970                         |
|            | HPAB0018         | <i>A. lancea</i>       | Yingshan, Huanggang, Hubei         | Qiuling Wang  | MZ460977                              | MZ456971                         |
|            | HPAB0021         | <i>A. lancea</i>       | Yingshan, Huanggang, Hubei         | Qiuling Wang  | MZ460978                              | MZ456972                         |
|            | HPAB0022         | <i>A. lancea</i>       | Yingshan, Huanggang, Hubei         | Qiuling Wang  | MZ460979                              | MZ456973                         |
|            | HPAB0023         | <i>A. lancea</i>       | Yingshan, Huanggang, Hubei         | Qiuling Wang  | MZ460980                              | MZ456974                         |
|            | HPAB0024         | <i>A. chinensis</i>    | Beijing Medicinal Botanical Garden | Qiuling Wang  | MZ460982                              | MZ456975                         |
|            | HPAB0025         | <i>A. chinensis</i>    | Beijing Medicinal Botanical Garden | Yulin Lin     | MZ460983                              | MZ456976                         |
|            | HPAB0026         | <i>A. lancea</i>       | Mao shan, Jurong, Jiangsu          | Yulin Lin     | MZ460984                              | MZ456977                         |



|          |                     |                             |              |          |          |
|----------|---------------------|-----------------------------|--------------|----------|----------|
| HPAB0027 | <i>A. koreana</i>   | Donggang, Dandong, Liaoning | Qiuling Wang | MZ460985 | MZ456978 |
| HPAB0028 | <i>A. lancea</i>    | Yingshan, Huanggang, Hubei  | Qiuling Wang | MZ460986 | MZ456979 |
| HPAB0029 | <i>A. chinensis</i> | Meixian, Baoji, Shanxi      | Qiuling Wang | MZ460987 | MZ456980 |
| HPAB0031 | <i>A. lancea</i>    | Tiantaishan, Hongan, Hubei  | Xinlei Zhao  | MZ460981 | MZ456981 |

**Supplementary Table 2.** The plastid genome accession number and SRA number for data downloaded from GenBank

| Source         | Genus                    | Species                     | Accession number (chloroplast genome) | Sequence Read Archive (SRA) |
|----------------|--------------------------|-----------------------------|---------------------------------------|-----------------------------|
| Genbank        | <i>Atractylodes</i>      | <i>A. lancea</i>            | MG874804                              | SRR10598214                 |
|                |                          | <i>A. chinensis</i>         | MG874805                              | SRR10725998                 |
|                |                          | <i>A. macrocephala</i>      | MN661162                              | SRR10597911                 |
|                |                          | <i>A. chinensis</i>         | MT834519                              | SRR13449941                 |
|                |                          | <i>A. macrocephala</i>      | MT834520                              | SRR13449940                 |
|                |                          | <i>A. koreana</i>           | MT834521                              | SRR13449939                 |
|                |                          | <i>A. japonica</i>          | MT834523                              | SRR13449937                 |
|                |                          | <i>A. carlinoides</i>       | MT834524                              | SRR13449936                 |
|                |                          | <i>A. japonica</i>          | MW301112                              | SRR13181860                 |
|                |                          | <i>A. koreana</i>           | MW301113                              | SRR13188655                 |
|                | <i>Arctium</i>           | <i>Arctium lappa</i>        | NC042724                              | SRR9845549                  |
|                | <i>Carduus</i>           | <i>Carduus acanthoides</i>  | NC053725                              | SRR12199770                 |
|                | <i>Carthamus</i>         | <i>Carthamus tinctorius</i> | NC030783                              | SRR3623470                  |
|                | <i>Centaurea</i>         | <i>Centaurea diffusa</i>    | NC024286                              | SRR2729212                  |
| <i>Cirsium</i> | <i>Cirsium japonicum</i> | NC053767                    | SRR12975765                           |                             |

|                             |                              |          |             |
|-----------------------------|------------------------------|----------|-------------|
| <i>Rhaponticum</i>          | <i>Rhaponticum uniflorum</i> | MW683229 | SRR14270266 |
| <i>Saussurea</i>            | <i>Saussurea medusa</i>      | NC052846 | SRR14470736 |
| <i>Tugarinovia</i>          | <i>Tugarinovia mongolica</i> | NC057258 | ERR4180103  |
| <i>Ainsliaea (outgroup)</i> | <i>Ainsliaea atifolia</i>    | NC056135 | SRR16072379 |
| <i>Lactuca (outgroup)</i>   | <i>Lactuca raddeana</i>      | NC056380 | SRR13311444 |

**Supplementary Table 3.** The plastid genome features of *Atractylodes* species.

| Features               | Size(bp)        | Size of LSC(bp) | Size of SSC(bp) | Size of IR(bp) | GC content(%) | GC content of LSC(%) | GC content of SSC(%) | GC content of IR(%) | Unique genes | Protein coding genes | tRNA genes | rRNA genes |
|------------------------|-----------------|-----------------|-----------------|----------------|---------------|----------------------|----------------------|---------------------|--------------|----------------------|------------|------------|
| <i>A. chinensis</i>    | 152,267~153,223 | 83,206~84,254   | 18,657~18,682   | 25,137~25,151  | 37.69~37.77   | 35.80~35.90          | 31.50~31.57          | 43.16~43.17         | 113          | 80                   | 29         | 4          |
| <i>A. koreana</i>      | 152,283~153,266 | 83,302~84,275   | 18,663~18,689   | 25,147~25,156  | 37.69~37.75   | 35.80~37.70          | 31.51~31.54          | 43.15~43.17         | 113          | 80                   | 29         | 4          |
| <i>A. lancea</i>       | 152,268~153,268 | 83,287~84,293   | 18,604~18,698   | 25,146~25,185  | 37.69~37.75   | 35.80~37.70          | 31.49~31.56          | 43.14~43.17         | 113          | 80                   | 29         | 4          |
| <i>A. japonica</i>     | 153,173         | 84,227          | 18,652          | 25,147         | 37.71         | 35.81                | 31.54                | 43.17               | 113          | 80                   | 29         | 4          |
| <i>A. macrocephala</i> | 153,265         | 84,285          | 18,674          | 25,153         | 37.7          | 35.80                | 31.56                | 43.16               | 113          | 80                   | 29         | 4          |

**Supplementary Table 4.** The Gene category of *Atractylodes* plastid genome.

| Category       | Group                                  | Genes                                                                                                                                                                                                                                                                                                          |                                   |             |
|----------------|----------------------------------------|----------------------------------------------------------------------------------------------------------------------------------------------------------------------------------------------------------------------------------------------------------------------------------------------------------------|-----------------------------------|-------------|
| Photosynthesis | Subunits of photosystem I              | <i>psaA, psaB, psaI, psaJ, psaC</i>                                                                                                                                                                                                                                                                            |                                   |             |
|                | Subunits of photosystem II             | <i>psbA, psbB, psbC, psbD, psbE, psbF, psbH, psbI, psbJ, psbK, psbL, psbM, psbN, psbT, psbZ</i>                                                                                                                                                                                                                |                                   |             |
|                | Subunits of NADH dehydrogenase         | <i>ndhA*, ndhB*, ndhC, ndhD, ndhE, ndhF, ndhG, ndhH, ndhI, ndhJ, ndhK</i>                                                                                                                                                                                                                                      |                                   |             |
|                | Subunits of cytochrome b/f complex     | <i>petA, petB*, petD*, petL, petN, petG</i>                                                                                                                                                                                                                                                                    |                                   |             |
|                | Subunits of ATP synthase               | <i>atpA, atpB, atpE, atpF*, atpH, atpI</i>                                                                                                                                                                                                                                                                     |                                   |             |
|                | Large subunit of Rubisco               | <i>rbcL</i>                                                                                                                                                                                                                                                                                                    |                                   |             |
|                | Large subunits of ribosome             | <i>rpl14, rpl16*, rpl2*, rpl20, rpl22, rpl23, rpl32, rpl33, rpl36</i>                                                                                                                                                                                                                                          |                                   |             |
|                | Small subunits of ribosome             | <i>rps2, rps3, rps4, rps7, rps8, rps11, rps12**, rps14, rps15, rps16*, rps18, rps19</i>                                                                                                                                                                                                                        |                                   |             |
|                | DNA dependent RNA polymerase           | <i>rpoA, rpoB, rpoC1*, rpoC2</i>                                                                                                                                                                                                                                                                               |                                   |             |
|                | Protein synthesis and self-replication | Ribosomal RNAs                                                                                                                                                                                                                                                                                                 | <i>rrn5, rrn4.5, rrn23, rrn16</i> |             |
| Transfer RNAs  |                                        | <i>trnA-UGC*, trnC-GCA, trnD-GUC, trnE-UUC, trnF-GAA, trnG-GCC, trnH-GUG, trnI-CAU, trnI-GAU*, trnK-UUU*, trnL-CAA, trnL-UAA*, trnL-UAG, trnM-CAU, trnN-GUU, trnP-UGG, trnQ-UUG, trnR-ACG, trnR-UCU, trnS-GCU, trnS-GGA, trnS-UGA, trnT-GGU, trnT-UGU, trnV-GAC, trnV-UAC*, trnW-CCA, trnY-GUA, trnY-M-CAU</i> |                                   |             |
|                |                                        | Maturase                                                                                                                                                                                                                                                                                                       | <i>matK</i>                       |             |
|                |                                        | Protease                                                                                                                                                                                                                                                                                                       | <i>clpP**</i>                     |             |
|                |                                        | Other genes                                                                                                                                                                                                                                                                                                    | Envelope membrane protein         | <i>cemA</i> |
|                |                                        |                                                                                                                                                                                                                                                                                                                | Acetyl-CoA carboxylase            | <i>accD</i> |
|                |                                        |                                                                                                                                                                                                                                                                                                                | C-type cytochrome synthesis gene  | <i>ccsA</i> |

|                  |                                                                                     |                                                               |
|------------------|-------------------------------------------------------------------------------------|---------------------------------------------------------------|
| Unknown function | Translational initiation factor<br>hypothetical chloroplast reading<br>frames (ycf) | <i>infA</i><br><i>ycf1, ycf15, ycf2, ycf3**</i> , <i>ycf4</i> |
|------------------|-------------------------------------------------------------------------------------|---------------------------------------------------------------|

Note: “\*” indicated that the gene contains one intron; “\*\*” indicated that the gene contains two introns.

**Supplementary Table 5.** The concatenated nrDNA sequence features of *Atractylodes* species.

| Features               | whole length | 18S length | ITS1 length | 5.8S length | ITS2 length | 28S length | GC content  | GC content of 18S | GC content of ITS1 | GC content of 5.8S | GC content of ITS2 | GC content of 28S |
|------------------------|--------------|------------|-------------|-------------|-------------|------------|-------------|-------------------|--------------------|--------------------|--------------------|-------------------|
| <i>A. chinensis</i>    | 5,849        | 1,809      | 259         | 158         | 229         | 3,394      | 55.48~55.51 | 49.47             | 62.93~63.71        | 54.43              | 62.93~63.71        | 57.28~57.31       |
| <i>A. koreana</i>      | 5,849        | 1,809      | 259         | 158         | 229         | 3,394      | 55.48~55.53 | 49.47             | 62.55~63.32        | 54.43              | 62.55~63.32        | 57.28~57.31       |
| <i>A. lancea</i>       | 5,849        | 1,809      | 259         | 158         | 229         | 3,394      | 55.55       | 49.47             | 63.71              | 54.43              | 63.71              | 57.31             |
| <i>A. japonica</i>     | 5,849        | 1,809      | 259         | 158         | 229         | 3,394      | 55.45       | 49.47             | 62.16              | 54.43              | 62.16              | 57.25             |
| <i>A. macrocephala</i> | 5,849        | 1,809      | 259         | 158         | 229         | 3,394      | 55.62       | 49.53             | 64.48              | 54.43              | 64.48              | 57.31             |

**Supplementary Table 6.** The relative synonymous codon usage (RSCU) in the *Atractylodes* plastid genomes.

| Amino acid | Codon | <i>A. lancea</i> |      | <i>A. chinensis</i> |      | <i>A. koreana</i> |      | <i>A. japonica</i> |      | <i>A. macrocephala</i> |      |
|------------|-------|------------------|------|---------------------|------|-------------------|------|--------------------|------|------------------------|------|
|            |       | Number           | RSCU | Number              | RSCU | Number            | RSCU | Number             | RSCU | Number                 | RSCU |
| Ala        | GCT   | 349              | 1.55 | 351                 | 1.55 | 371               | 1.60 | 353                | 1.56 | 352                    | 1.56 |
|            | GCC   | 210              | 0.93 | 211                 | 0.93 | 208               | 0.90 | 212                | 0.93 | 210                    | 0.93 |
|            | GCA   | 224              | 0.99 | 224                 | 0.99 | 227               | 0.99 | 224                | 0.99 | 224                    | 0.99 |

|     |     |     |      |     |      |     |      |     |      |     |      |
|-----|-----|-----|------|-----|------|-----|------|-----|------|-----|------|
|     | GCG | 119 | 0.53 | 117 | 0.52 | 120 | 0.52 | 118 | 0.52 | 117 | 0.52 |
| Cys | TGT | 277 | 1.14 | 276 | 1.15 | 267 | 1.14 | 277 | 1.15 | 275 | 1.15 |
|     | TGC | 207 | 0.86 | 203 | 0.85 | 202 | 0.86 | 203 | 0.85 | 202 | 0.85 |
|     | GAT | 499 | 1.49 | 492 | 1.49 | 531 | 1.51 | 494 | 1.49 | 490 | 1.48 |
| Asp | GAC | 169 | 0.51 | 169 | 0.51 | 170 | 0.49 | 171 | 0.51 | 171 | 0.52 |
|     | GAA | 671 | 1.46 | 669 | 1.45 | 698 | 1.46 | 671 | 1.45 | 668 | 1.45 |
| Glu | GAG | 250 | 0.54 | 253 | 0.55 | 259 | 0.54 | 255 | 0.55 | 256 | 0.55 |
|     | TTT | 884 | 1.20 | 871 | 1.19 | 877 | 1.21 | 871 | 1.19 | 871 | 1.19 |
| Phe | TTC | 589 | 0.80 | 592 | 0.81 | 572 | 0.79 | 590 | 0.81 | 590 | 0.81 |
|     | GGT | 402 | 1.31 | 399 | 1.31 | 408 | 1.31 | 401 | 1.31 | 400 | 1.31 |
| Gly | GGC | 187 | 0.61 | 186 | 0.61 | 186 | 0.60 | 187 | 0.61 | 187 | 0.61 |
|     | GGA | 402 | 1.31 | 397 | 1.31 | 419 | 1.34 | 402 | 1.31 | 396 | 1.30 |
|     | GGG | 237 | 0.77 | 234 | 0.77 | 233 | 0.75 | 239 | 0.78 | 234 | 0.77 |
| His | CAT | 353 | 1.38 | 349 | 1.36 | 365 | 1.41 | 351 | 1.37 | 348 | 1.36 |
|     | CAC | 159 | 0.62 | 161 | 0.64 | 153 | 0.60 | 162 | 0.63 | 162 | 0.64 |
| Ile | ATT | 807 | 1.20 | 806 | 1.17 | 820 | 1.22 | 811 | 1.17 | 806 | 1.17 |
|     | ATC | 511 | 0.76 | 520 | 0.76 | 495 | 0.74 | 523 | 0.76 | 522 | 0.76 |
|     | ATA | 699 | 1.03 | 733 | 1.07 | 701 | 1.04 | 738 | 1.07 | 736 | 1.07 |
| Lys | AAA | 896 | 1.35 | 897 | 1.33 | 896 | 1.36 | 905 | 1.33 | 897 | 1.33 |
|     | AAG | 435 | 0.65 | 449 | 0.67 | 428 | 0.65 | 455 | 0.67 | 456 | 0.67 |
|     | TTA | 542 | 1.44 | 549 | 1.42 | 559 | 1.47 | 552 | 1.42 | 547 | 1.41 |
| Leu | TTG | 542 | 1.43 | 557 | 1.44 | 555 | 1.47 | 559 | 1.44 | 560 | 1.44 |
|     | CTT | 436 | 1.15 | 442 | 1.14 | 441 | 1.16 | 445 | 1.14 | 442 | 1.14 |
|     | CTC | 221 | 0.58 | 227 | 0.59 | 215 | 0.57 | 228 | 0.59 | 227 | 0.58 |
|     | CTA | 323 | 0.85 | 336 | 0.87 | 309 | 0.81 | 338 | 0.87 | 339 | 0.87 |
|     | CTG | 204 | 0.54 | 212 | 0.55 | 202 | 0.53 | 213 | 0.55 | 216 | 0.56 |

|     |     |     |      |     |      |     |      |     |      |     |      |
|-----|-----|-----|------|-----|------|-----|------|-----|------|-----|------|
| Met | ATG | 566 | 1.00 | 588 | 1.00 | 575 | 1.00 | 590 | 1    | 588 | 1.00 |
| Asn | AAT | 724 | 1.37 | 710 | 1.36 | 763 | 1.40 | 710 | 1.36 | 707 | 1.36 |
|     | AAC | 334 | 0.63 | 336 | 0.64 | 324 | 0.60 | 336 | 0.64 | 335 | 0.64 |
| Pro | CCT | 272 | 1.17 | 273 | 1.17 | 283 | 1.20 | 275 | 1.17 | 276 | 1.18 |
|     | CCC | 188 | 0.81 | 189 | 0.81 | 190 | 0.81 | 192 | 0.82 | 188 | 0.81 |
|     | CCA | 329 | 1.42 | 328 | 1.41 | 328 | 1.40 | 334 | 1.42 | 328 | 1.41 |
|     | CCG | 138 | 0.60 | 142 | 0.61 | 138 | 0.59 | 141 | 0.6  | 141 | 0.60 |
| Gln | CAA | 473 | 1.42 | 471 | 1.40 | 496 | 1.44 | 475 | 1.4  | 471 | 1.40 |
|     | CAG | 195 | 0.58 | 201 | 0.60 | 192 | 0.56 | 203 | 0.6  | 202 | 0.60 |
|     | AGA | 402 | 1.87 | 387 | 1.83 | 399 | 1.87 | 389 | 1.83 | 384 | 1.83 |
| Arg | AGG | 241 | 1.12 | 235 | 1.11 | 229 | 1.07 | 236 | 1.11 | 233 | 1.11 |
|     | CGT | 186 | 0.87 | 188 | 0.89 | 196 | 0.92 | 192 | 0.9  | 188 | 0.89 |
|     | CGC | 107 | 0.50 | 107 | 0.51 | 109 | 0.51 | 107 | 0.5  | 107 | 0.51 |
|     | CGA | 221 | 1.03 | 220 | 1.04 | 224 | 1.05 | 222 | 1.04 | 219 | 1.04 |
|     | CGG | 130 | 0.61 | 132 | 0.62 | 128 | 0.60 | 132 | 0.62 | 131 | 0.62 |
|     | AGT | 318 | 1.06 | 312 | 1.06 | 331 | 1.09 | 310 | 1.05 | 310 | 1.06 |
| Ser | AGC | 243 | 0.80 | 234 | 0.79 | 241 | 0.80 | 232 | 0.79 | 232 | 0.79 |
|     | TCT | 413 | 1.37 | 406 | 1.38 | 423 | 1.40 | 410 | 1.39 | 406 | 1.38 |
|     | TCC | 356 | 1.18 | 352 | 1.20 | 356 | 1.18 | 352 | 1.19 | 351 | 1.19 |
|     | TCA | 293 | 0.97 | 284 | 0.97 | 278 | 0.92 | 286 | 0.97 | 286 | 0.97 |
|     | TCG | 186 | 0.62 | 178 | 0.61 | 187 | 0.62 | 178 | 0.6  | 178 | 0.61 |
|     | ACT | 357 | 1.28 | 353 | 1.28 | 374 | 1.32 | 355 | 1.28 | 353 | 1.28 |
| Thr | ACC | 286 | 1.02 | 281 | 1.02 | 287 | 1.01 | 283 | 1.02 | 280 | 1.02 |
|     | ACA | 290 | 1.04 | 287 | 1.04 | 291 | 1.03 | 289 | 1.04 | 286 | 1.04 |
| Val | ACG | 184 | 0.66 | 183 | 0.66 | 184 | 0.65 | 183 | 0.66 | 184 | 0.67 |
|     | GTT | 388 | 1.36 | 389 | 1.35 | 394 | 1.38 | 393 | 1.34 | 390 | 1.35 |

|       |     |       |       |       |       |       |       |       |       |       |       |
|-------|-----|-------|-------|-------|-------|-------|-------|-------|-------|-------|-------|
|       | GTC | 181   | 0.64  | 181   | 0.63  | 175   | 0.61  | 186   | 0.64  | 181   | 0.63  |
|       | GTA | 409   | 1.44  | 419   | 1.45  | 411   | 1.44  | 425   | 1.45  | 420   | 1.45  |
|       | GTG | 161   | 0.57  | 164   | 0.57  | 162   | 0.57  | 166   | 0.57  | 164   | 0.57  |
| Trp   | TGG | 381   | 1.00  | 382   | 1.00  | 375   | 1.00  | 381   | 1     | 382   | 1.00  |
|       | TAT | 585   | 1.32  | 564   | 1.31  | 601   | 1.35  | 565   | 1.31  | 561   | 1.31  |
| Tyr   | TAC | 304   | 0.68  | 298   | 0.69  | 291   | 0.66  | 297   | 0.69  | 297   | 0.69  |
|       | TAA | 443   | 1.22  | 439   | 1.21  | 387   | 1.29  | 441   | 1.22  | 438   | 1.21  |
| Stop  | TAG | 308   | 0.84  | 313   | 0.87  | 263   | 0.84  | 314   | 0.87  | 313   | 0.87  |
|       | TGA | 343   | 0.94  | 334   | 0.92  | 280   | 0.88  | 333   | 0.92  | 333   | 0.92  |
| Total |     | 22865 | 64.01 | 22864 | 64.02 | 22868 | 64.01 | 22861 | 64.03 | 22868 | 63.98 |

**Supplementary Table 7.** The plastid simple sequence repeats (cpSSRs) of the *Atractylodes* species. p: perfect microsatellites; c: compound. The structures of the microsatellite repeats are presented as repeat units in parenthesis and the numbers of the repeat units.

| Sample ID              | SSR nr. | SSR type | SSR                                  | Size (bp) | Start (bp) | End (bp) | Region |
|------------------------|---------|----------|--------------------------------------|-----------|------------|----------|--------|
|                        | 1       | p1       | (T)11                                | 11        | 1975       | 1985     | LSC    |
|                        | 2       | p1       | (T)12                                | 12        | 12926      | 12937    | LSC    |
|                        | 3       | p1       | (A)10                                | 10        | 13620      | 13629    | LSC    |
|                        | 4       | p1       | (A)10                                | 10        | 18675      | 18684    | LSC    |
|                        | 5       | p1       | (T)10                                | 10        | 23517      | 23526    | LSC    |
|                        | 6       | p1       | (T)10                                | 10        | 25242      | 25251    | LSC    |
|                        | 7       | p1       | (A)10                                | 10        | 25395      | 25404    | LSC    |
|                        | 8       | p1       | (T)10                                | 10        | 26336      | 26345    | LSC    |
|                        | 9       | p1       | (T)11                                | 11        | 28275      | 28285    | LSC    |
| <i>A. macrocephala</i> | 10      | p1       | (T)15                                | 15        | 34956      | 34970    | LSC    |
|                        | 11      | p1       | (A)10                                | 10        | 35827      | 35836    | LSC    |
|                        | 12      | p1       | (A)10                                | 10        | 44241      | 44250    | LSC    |
|                        | 13      | p1       | (T)11                                | 11        | 46328      | 46338    | LSC    |
|                        | 14      | c        | (T)11cattttatttttaattaaataaaatg(A)14 | 55        | 46688      | 46742    | LSC    |
|                        | 15      | p1       | (T)13                                | 13        | 50516      | 50528    | LSC    |
|                        | 16      | p1       | (T)11                                | 11        | 50642      | 50652    | LSC    |
|                        | 17      | p1       | (T)15                                | 15        | 51499      | 51513    | LSC    |
|                        | 18      | p1       | (T)11                                | 11        | 54911      | 54921    | LSC    |
|                        | 19      | p1       | (T)11                                | 11        | 59542      | 59552    | LSC    |
|                        | 20      | p1       | (T)18                                | 18        | 63422      | 63439    | LSC    |



|                     |    |    |                                      |    |        |        |     |
|---------------------|----|----|--------------------------------------|----|--------|--------|-----|
|                     | 21 | p1 | (A)15                                | 15 | 65668  | 65682  | LSC |
|                     | 22 | p1 | (T)11                                | 11 | 71635  | 71645  | LSC |
|                     | 23 | p1 | (A)10                                | 10 | 78005  | 78014  | LSC |
|                     | 24 | p1 | (T)10                                | 10 | 78246  | 78255  | LSC |
|                     | 25 | p1 | (T)17                                | 17 | 80684  | 80700  | LSC |
|                     | 26 | p1 | (A)14                                | 14 | 107727 | 107740 | IRB |
|                     | 27 | p1 | (A)10                                | 10 | 109877 | 109886 | SSC |
|                     | 28 | p1 | (A)10                                | 10 | 110331 | 110340 | SSC |
|                     | 29 | p1 | (T)10                                | 10 | 125565 | 125574 | SSC |
|                     | 30 | p1 | (T)14                                | 14 | 129811 | 129824 | IRA |
|                     | 1  | p1 | (T)14                                | 14 | 1974   | 1987   | LSC |
|                     | 2  | p1 | (C)10                                | 10 | 5451   | 5460   | LSC |
|                     | 3  | p1 | (T)11                                | 11 | 12924  | 12934  | LSC |
|                     | 4  | p1 | (A)10                                | 10 | 13617  | 13626  | LSC |
|                     | 5  | p1 | (A)10                                | 10 | 18672  | 18681  | LSC |
|                     | 6  | p1 | (T)10                                | 10 | 23496  | 23505  | LSC |
|                     | 7  | p1 | (T)10                                | 10 | 25221  | 25230  | LSC |
|                     | 8  | p1 | (A)10                                | 10 | 25374  | 25383  | LSC |
| <i>A. chinensis</i> | 9  | p1 | (T)10                                | 10 | 26315  | 26324  | LSC |
|                     | 10 | p1 | (T)12                                | 12 | 28254  | 28265  | LSC |
|                     | 11 | p1 | (A)11                                | 11 | 30066  | 30076  | LSC |
|                     | 12 | p1 | (T)15                                | 15 | 34938  | 34952  | LSC |
|                     | 13 | p1 | (A)10                                | 10 | 35801  | 35810  | LSC |
|                     | 14 | p1 | (A)10                                | 10 | 44215  | 44224  | LSC |
|                     | 15 | p1 | (T)11                                | 11 | 46297  | 46307  | LSC |
|                     | 16 | c  | (T)13cattttatttttaattaaataaaatg(A)11 | 54 | 46657  | 46710  | LSC |

|                   |    |    |       |    |        |        |     |
|-------------------|----|----|-------|----|--------|--------|-----|
|                   | 17 | p1 | (T)16 | 16 | 50489  | 50504  | LSC |
|                   | 18 | p1 | (T)11 | 11 | 53902  | 53912  | LSC |
|                   | 19 | p1 | (T)11 | 11 | 58534  | 58544  | LSC |
|                   | 20 | p1 | (T)17 | 17 | 62414  | 62430  | LSC |
|                   | 21 | p1 | (A)13 | 13 | 64675  | 64687  | LSC |
|                   | 22 | p1 | (T)11 | 11 | 70633  | 70643  | LSC |
|                   | 23 | p1 | (A)10 | 10 | 77003  | 77012  | LSC |
|                   | 24 | p1 | (T)10 | 10 | 77244  | 77253  | LSC |
|                   | 25 | p1 | (T)13 | 13 | 79682  | 79694  | LSC |
|                   | 26 | p1 | (A)13 | 13 | 106727 | 106739 | IRB |
|                   | 27 | p1 | (A)10 | 10 | 108858 | 108867 | SSC |
|                   | 28 | p1 | (A)10 | 10 | 109312 | 109321 | SSC |
|                   | 29 | p1 | (T)10 | 10 | 124546 | 124555 | SSC |
|                   | 30 | p1 | (T)13 | 13 | 128815 | 128827 | IRA |
|                   | 1  | p1 | (T)10 | 10 | 1981   | 1990   | LSC |
|                   | 2  | p1 | (T)11 | 11 | 12934  | 12944  | LSC |
|                   | 3  | p1 | (A)10 | 10 | 13627  | 13636  | LSC |
|                   | 4  | p1 | (T)12 | 12 | 17310  | 17321  | LSC |
|                   | 5  | p1 | (A)10 | 10 | 18681  | 18690  | LSC |
| <i>A. koreana</i> | 6  | p1 | (T)10 | 10 | 23523  | 23532  | LSC |
|                   | 7  | p1 | (T)10 | 10 | 25248  | 25257  | LSC |
|                   | 8  | p1 | (A)10 | 10 | 25401  | 25410  | LSC |
|                   | 9  | p1 | (T)10 | 10 | 26342  | 26351  | LSC |
|                   | 10 | p1 | (T)10 | 10 | 28281  | 28290  | LSC |
|                   | 11 | p1 | (A)10 | 10 | 30091  | 30100  | LSC |
|                   | 12 | p1 | (T)14 | 14 | 34962  | 34975  | LSC |

|                  |    |    |       |    |        |        |     |
|------------------|----|----|-------|----|--------|--------|-----|
|                  | 13 | p1 | (A)11 | 11 | 35882  | 35892  | LSC |
|                  | 14 | p1 | (A)10 | 10 | 44243  | 44252  | LSC |
|                  | 15 | p1 | (T)11 | 11 | 46330  | 46340  | LSC |
|                  | 16 | p1 | (A)11 | 11 | 46722  | 46732  | LSC |
|                  | 17 | p1 | (T)18 | 18 | 50505  | 50522  | LSC |
|                  | 18 | p1 | (T)10 | 10 | 51492  | 51501  | LSC |
|                  | 19 | p1 | (T)10 | 10 | 54899  | 54908  | LSC |
|                  | 20 | p1 | (T)10 | 10 | 59514  | 59523  | LSC |
|                  | 21 | p1 | (T)17 | 17 | 63399  | 63415  | LSC |
|                  | 22 | p1 | (A)14 | 14 | 65644  | 65657  | LSC |
|                  | 23 | p1 | (T)10 | 10 | 71604  | 71613  | LSC |
|                  | 24 | p1 | (A)10 | 10 | 77973  | 77982  | LSC |
|                  | 25 | p1 | (T)10 | 10 | 78214  | 78223  | LSC |
|                  | 26 | p1 | (T)13 | 13 | 80652  | 80664  | LSC |
|                  | 27 | p1 | (A)14 | 14 | 107684 | 107697 | IRB |
|                  | 28 | p1 | (A)10 | 10 | 109825 | 109834 | SSC |
|                  | 29 | p1 | (A)10 | 10 | 110279 | 110288 | SSC |
|                  | 30 | p1 | (T)14 | 14 | 129783 | 129796 | IRA |
|                  | 1  | p1 | (T)11 | 11 | 12956  | 12966  | LSC |
|                  | 2  | p1 | (A)10 | 10 | 13649  | 13658  | LSC |
|                  | 3  | p1 | (T)12 | 12 | 17332  | 17343  | LSC |
| <i>A. lancea</i> | 4  | p1 | (A)10 | 10 | 18703  | 18712  | LSC |
|                  | 5  | p1 | (T)11 | 11 | 23545  | 23555  | LSC |
|                  | 6  | p1 | (T)10 | 10 | 25271  | 25280  | LSC |
|                  | 7  | p1 | (A)10 | 10 | 25424  | 25433  | LSC |
|                  | 8  | p1 | (T)10 | 10 | 26365  | 26374  | LSC |

|                    |       |    |       |    |        |        |     |
|--------------------|-------|----|-------|----|--------|--------|-----|
|                    | 9     | p1 | (T)10 | 10 | 28304  | 28313  | LSC |
|                    | 10    | p1 | (A)10 | 10 | 30114  | 30123  | LSC |
|                    | 11    | p1 | (T)14 | 14 | 34985  | 34998  | LSC |
|                    | 12    | p1 | (A)11 | 11 | 35904  | 35914  | LSC |
|                    | 13    | p1 | (A)10 | 10 | 44265  | 44274  | LSC |
|                    | 14    | p1 | (T)11 | 11 | 46352  | 46362  | LSC |
|                    | 15    | p1 | (A)13 | 13 | 46744  | 46756  | LSC |
|                    | 16    | p1 | (T)18 | 18 | 50529  | 50546  | LSC |
|                    | 17    | p1 | (T)10 | 10 | 51516  | 51525  | LSC |
|                    | 18    | p1 | (T)10 | 10 | 54923  | 54932  | LSC |
|                    | 19    | p1 | (T)10 | 10 | 59538  | 59547  | LSC |
|                    | 20    | p1 | (T)17 | 17 | 63423  | 63439  | LSC |
|                    | 21    | p1 | (A)14 | 14 | 65668  | 65681  | LSC |
|                    | 22    | p1 | (T)10 | 10 | 71628  | 71637  | LSC |
|                    | 23    | p1 | (A)10 | 10 | 77997  | 78006  | LSC |
|                    | 24    | p1 | (T)10 | 10 | 78238  | 78247  | LSC |
|                    | 25    | p1 | (T)13 | 13 | 80676  | 80688  | LSC |
|                    | 26    | p1 | (A)14 | 14 | 107708 | 107721 | IRB |
|                    | 27    | p1 | (A)10 | 10 | 109849 | 109858 | SSC |
|                    | 28    | p1 | (A)10 | 10 | 110303 | 110312 | SSC |
|                    | 29    | p1 | (T)14 | 14 | 129813 | 129826 | IRA |
|                    | <hr/> |    |       |    |        |        |     |
|                    | 1     | p1 | (T)11 | 11 | 1975   | 1985   | LSC |
|                    | 2     | p1 | (T)11 | 11 | 12928  | 12938  | LSC |
| <i>A. japonica</i> | 3     | p1 | (A)10 | 10 | 13621  | 13630  | LSC |
|                    | 4     | p1 | (A)10 | 10 | 16852  | 16861  | LSC |
|                    | 5     | p1 | (T)11 | 11 | 17305  | 17315  | LSC |

|    |    |                                        |    |        |        |     |
|----|----|----------------------------------------|----|--------|--------|-----|
| 6  | p1 | (A)10                                  | 10 | 18675  | 18684  | LSC |
| 7  | p1 | (T)10                                  | 10 | 23499  | 23508  | LSC |
| 8  | p1 | (T)10                                  | 10 | 25224  | 25233  | LSC |
| 9  | p1 | (T)10                                  | 10 | 26317  | 26326  | LSC |
| 10 | p1 | (T)10                                  | 10 | 28256  | 28265  | LSC |
| 11 | p1 | (A)10                                  | 10 | 30066  | 30075  | LSC |
| 12 | p1 | (T)13                                  | 13 | 34937  | 34949  | LSC |
| 13 | p1 | (A)10                                  | 10 | 35856  | 35865  | LSC |
| 14 | p1 | (A)10                                  | 10 | 44216  | 44225  | LSC |
| 15 | p1 | (T)11                                  | 11 | 46303  | 46313  | LSC |
| 16 | c  | (T)11cattttatttttaattaaaaataaaatg(A)12 | 53 | 46663  | 46715  | LSC |
| 17 | p1 | (T)15                                  | 15 | 50488  | 50502  | LSC |
| 18 | p1 | (T)10                                  | 10 | 51472  | 51481  | LSC |
| 19 | p1 | (T)11                                  | 11 | 54879  | 54889  | LSC |
| 20 | p1 | (T)11                                  | 11 | 59495  | 59505  | LSC |
| 21 | p1 | (T)17                                  | 17 | 63375  | 63391  | LSC |
| 22 | p1 | (A)16                                  | 16 | 65620  | 65635  | LSC |
| 23 | p1 | (T)11                                  | 11 | 71582  | 71592  | LSC |
| 24 | p1 | (A)10                                  | 10 | 77952  | 77961  | LSC |
| 25 | p1 | (T)10                                  | 10 | 78193  | 78202  | LSC |
| 26 | p1 | (T)13                                  | 13 | 80631  | 80643  | LSC |
| 27 | p1 | (A)14                                  | 14 | 107663 | 107676 | IRB |
| 28 | p1 | (A)10                                  | 10 | 109804 | 109813 | SSC |
| 29 | p1 | (A)10                                  | 10 | 110258 | 110267 | SSC |
| 30 | p1 | (T)14                                  | 14 | 129725 | 129738 | IRA |

---

**Supplementary Table 8.** The tandem repeats detected in the plastid genomes of *Atractylodes* species.

| Species             | Indices        | Size(bp) | Repeat number | Start position | Region                     |
|---------------------|----------------|----------|---------------|----------------|----------------------------|
| <i>A. chinensis</i> | 3766--3816     | 25       | 2             | 3766           | LSC,tRNA(trnK-UUU)         |
|                     | 12183--12209   | 13       | 2.1           | 12183          | LSC,IGS(trnE-UUC_rpoB)     |
|                     | 12439--12502   | 33       | 1.9           | 12439          | LSC,IGS(trnE-UUC_rpoB)     |
|                     | 12576--12623   | 24       | 2             | 12576          | LSC,IGS(trnE-UUC_rpoB)     |
|                     | 21023--21064   | 21       | 2             | 21023          | LSC,CDS(rpoC2)             |
|                     | 25327--25351   | 12       | 2.1           | 25327          | LSC,CDS(atpI)              |
|                     | 31893--31928   | 18       | 2             | 31893          | LSC,IGS(trnT-GGU_psbD)     |
|                     | 41883--41914   | 16       | 2             | 41883          | LSC,IGS(psaA_ycf3)         |
|                     | 47552--47589   | 18       | 2.1           | 47552          | LSC,IGS(trnL-UAA_trnF-GAA) |
|                     | 51204--51233   | 15       | 2             | 51204          | LSC,IGS(trnV-UAC_trnM-CAU) |
|                     | 53964--53995   | 16       | 2             | 53964          | LSC,IGS(atpB_rbcL)         |
|                     | 58287--58334   | 20       | 2.3           | 58287          | LSC,IGS(accD_psaI)         |
|                     | 62736--62777   | 19       | 2.2           | 62736          | LSC,IGS(petA_psbJ)         |
|                     | 62751--62782   | 16       | 2             | 62751          | LSC,IGS(petA_psbJ)         |
|                     | 67141--67181   | 21       | 2             | 67141          | LSC,CDS(rps18)             |
|                     | 76212--76249   | 19       | 2             | 76212          | LSC,CDS(petD)              |
|                     | 88132--88201   | 21       | 3.3           | 88132          | IRB,CDS(ycf2)              |
|                     | 90528--90569   | 18       | 2.3           | 90528          | IRB,CDS(ycf2)              |
|                     | 106367--106428 | 32       | 1.9           | 106367         | IRB,IGS(rrn4.5_rrn5)       |
|                     | 108472--108507 | 12       | 3             | 108472         | IRB,CDS(ycf1)              |
|                     | 109155--109245 | 45       | 2             | 109155         | SSC,CDS(ycf1)              |
|                     | 109303--109346 | 21       | 2.1           | 109303         | SSC,CDS(ycf1)              |
|                     | 111858--111886 | 12       | 2.5           | 111858         | SSC,CDS(ycf1)              |
| 111961--112002      | 21             | 2        | 111961        | SSC,CDS(ycf1)  |                            |

|                   |                |    |     |        |                            |
|-------------------|----------------|----|-----|--------|----------------------------|
|                   | 112169--112256 | 30 | 2.9 | 112169 | SSC,CDS(ycf1)              |
|                   | 112276--112352 | 30 | 2.5 | 112276 | SSC,CDS(ycf1)              |
|                   | 112692--112727 | 18 | 2   | 112692 | SSC,CDS(ycf1)              |
|                   | 124582--124613 | 16 | 2   | 124582 | SSC,IGS(rpl32_ndhF)        |
|                   | 127063--127108 | 23 | 2   | 127063 | SSC,CDS(ndhF)              |
|                   | 129126--129187 | 32 | 1.9 | 129126 | IRA,IGS(rrn5_rrn4.5)       |
|                   | 144985--145026 | 18 | 2.3 | 144985 | IRA,CDS(ycf2)              |
|                   | 147353--147407 | 21 | 2.6 | 147353 | IRA,CDS(ycf2)              |
|                   | 147370--147422 | 21 | 2.5 | 147370 | IRA,CDS(ycf2)              |
|                   | 3776--3826     | 25 | 2   | 3776   | LSC,tRNA(trnK-UUU)         |
|                   | 12193--12219   | 13 | 2.1 | 12193  | LSC,IGS(trnE-UUC_rpoB)     |
|                   | 12449--12512   | 33 | 1.9 | 12449  | LSC,IGS(trnE-UUC_rpoB)     |
|                   | 12586--12633   | 24 | 2   | 12586  | LSC,IGS(trnE-UUC_rpoB)     |
|                   | 19089--19127   | 18 | 2.2 | 19089  | LSC,IGS(rpoC1_rpoC2)       |
|                   | 21050--21091   | 21 | 2   | 21050  | LSC,CDS(rpoC2)             |
|                   | 25354--25378   | 12 | 2.1 | 25354  | LSC,IGS(atpI_atpH)         |
|                   | 31917--31952   | 18 | 2   | 31917  | LSC,IGS(trnT-GGU_psbD)     |
| <i>A. koreana</i> | 41911--41942   | 16 | 2   | 41911  | LSC,IGS(psaA_ycf3)         |
|                   | 51145--51182   | 17 | 2.2 | 51145  | LSC,IGS(ndhC_trnV-UAC)     |
|                   | 52201--52230   | 15 | 2   | 52201  | LSC,IGS(trnV-UAC_trnM-CAU) |
|                   | 59267--59314   | 20 | 2.3 | 59267  | LSC,IGS(accD_psaI)         |
|                   | 68111--68151   | 21 | 2   | 68111  | LSC,CDS(rps18)             |
|                   | 77182--77219   | 19 | 2   | 77182  | LSC,CDS(petD)              |
|                   | 89094--89163   | 21 | 3.3 | 89094  | IRB,CDS(ycf2)              |
|                   | 91490--91531   | 18 | 2.3 | 91490  | IRB,CDS(ycf2)              |
|                   | 107324--107385 | 32 | 1.9 | 107324 | IRB,IGS(rrn4.5_rrn5)       |

|                  |                |    |     |        |                        |
|------------------|----------------|----|-----|--------|------------------------|
|                  | 109430--109465 | 12 | 3   | 109430 | SSC,CDS(ycf1)          |
|                  | 109620--109644 | 9  | 2.8 | 109620 | SSC,CDS(ycf1)          |
|                  | 109608--109665 | 21 | 2.8 | 109608 | SSC,CDS(ycf1)          |
|                  | 110122--110212 | 45 | 2   | 110122 | SSC,CDS(ycf1)          |
|                  | 110270--110313 | 21 | 2.1 | 110270 | SSC,CDS(ycf1)          |
|                  | 112825--112853 | 12 | 2.5 | 112825 | SSC,CDS(ycf1)          |
|                  | 112928--112969 | 21 | 2   | 112928 | SSC,CDS(ycf1)          |
|                  | 113130--113217 | 30 | 2.9 | 113130 | SSC,CDS(ycf1)          |
|                  | 113237--113307 | 30 | 2.6 | 113237 | SSC,CDS(ycf1)          |
|                  | 113647--113682 | 18 | 2   | 113647 | SSC,CDS(ycf1)          |
|                  | 124883--124907 | 12 | 2.1 | 124883 | SSC,IGS(rpl32_ndhF)    |
|                  | 125553--125584 | 16 | 2   | 125553 | SSC,IGS(rpl32_ndhF)    |
|                  | 128031--128076 | 20 | 2.3 | 128031 | SSC,CDS(ndhF)          |
|                  | 130095--130156 | 32 | 1.9 | 130095 | IRA,IGS(rrn5_rrn4.5)   |
|                  | 145949--145990 | 18 | 2.3 | 145949 | IRA,CDS(ycf2)          |
|                  | 148317--148371 | 21 | 2.6 | 148317 | IRA,CDS(ycf2)          |
|                  | 148334--148386 | 21 | 2.5 | 148334 | IRA,CDS(ycf2)          |
|                  | 3775--3825     | 25 | 2   | 3775   | LSC,tRNA(trnK-UUU)     |
|                  | 9833--9877     | 11 | 4   | 9833   | LSC,IGS(trnC-GCA_petN) |
|                  | 9831--9876     | 23 | 2   | 9831   | LSC,IGS(trnC-GCA_petN) |
|                  | 12215--12241   | 13 | 2.1 | 12215  | LSC,IGS(trnE-UUC_rpoB) |
| <i>A. lancea</i> | 12471--12534   | 33 | 1.9 | 12471  | LSC,IGS(trnE-UUC_rpoB) |
|                  | 12608--12655   | 24 | 2   | 12608  | LSC,IGS(trnE-UUC_rpoB) |
|                  | 19111--19149   | 18 | 2.2 | 19111  | LSC,IGS(rpoC1_rpoC2)   |
|                  | 21072--21113   | 21 | 2   | 21072  | LSC,CDS(rpoC2)         |
|                  | 25377--25401   | 12 | 2.1 | 25377  | LSC,IGS(atpI_atpH)     |



|                |    |     |        |                            |
|----------------|----|-----|--------|----------------------------|
| 31940--31975   | 18 | 2   | 31940  | LSC,IGS(trnT-GGU_psbD)     |
| 41933--41964   | 16 | 2   | 41933  | LSC,IGS(psaA_ycf3)         |
| 51169--51206   | 17 | 2.2 | 51169  | LSC,IGS(ndhC_trnV-UAC)     |
| 52225--52254   | 15 | 2   | 52225  | LSC,IGS(trnV-UAC_trnM-CAU) |
| 59291--59338   | 20 | 2.3 | 59291  | LSC,IGS(accD_psaI)         |
| 68135--68175   | 21 | 2   | 68135  | LSC,CDS(rps18)             |
| 77206--77243   | 19 | 2   | 77206  | LSC,CDS(petD)              |
| 89118--89187   | 21 | 3.3 | 89118  | IRB,CDS(ycf2)              |
| 91514--91555   | 18 | 2.3 | 91514  | IRB,CDS(ycf2)              |
| 107348--107409 | 32 | 1.9 | 107348 | IRB,IGS(rrn4.5_rrn5)       |
| 109454--109489 | 12 | 3   | 109454 | SSC,CDS(ycf1)              |
| 109644--109668 | 9  | 2.8 | 109644 | SSC,CDS(ycf1)              |
| 109632--109689 | 21 | 2.8 | 109632 | SSC,CDS(ycf1)              |
| 110146--110236 | 45 | 2   | 110146 | SSC,CDS(ycf1)              |
| 110294--110337 | 21 | 2.1 | 110294 | SSC,CDS(ycf1)              |
| 112849--112877 | 12 | 2.5 | 112849 | SSC,CDS(ycf1)              |
| 112952--112993 | 21 | 2   | 112952 | SSC,CDS(ycf1)              |
| 113160--113247 | 30 | 2.9 | 113160 | SSC,CDS(ycf1)              |
| 113267--113337 | 30 | 2.6 | 113267 | SSC,CDS(ycf1)              |
| 113677--113712 | 18 | 2   | 113677 | SSC,CDS(ycf1)              |
| 124913--124937 | 12 | 2.1 | 124913 | SSC,IGS(rpl32_ndhF)        |
| 125583--125614 | 16 | 2   | 125583 | SSC,IGS(rpl32_ndhF)        |
| 128061--128106 | 20 | 2.3 | 128061 | SSC,CDS(ndhF)              |
| 130125--130186 | 32 | 1.9 | 130125 | IRA,IGS(rrn5_rrn4.5)       |
| 145979--146020 | 18 | 2.3 | 145979 | IRA,CDS(ycf2)              |
| 148347--148401 | 21 | 2.6 | 148347 | IRA,CDS(ycf2)              |

|                    |                |    |     |        |                            |
|--------------------|----------------|----|-----|--------|----------------------------|
|                    | 148364--148416 | 21 | 2.5 | 148364 | IRA,CDS(ycf2)              |
|                    | 3764--3814     | 25 | 2   | 3764   | LSC,tRNA(trnK-UUU)         |
|                    | 12187--12213   | 13 | 2.1 | 12187  | LSC,IGS(trnE-UUC_rpoB)     |
|                    | 12443--12506   | 33 | 1.9 | 12443  | LSC,IGS(trnE-UUC_rpoB)     |
|                    | 12580--12627   | 24 | 2   | 12580  | LSC,IGS(trnE-UUC_rpoB)     |
|                    | 21026--21067   | 21 | 2   | 21026  | LSC,CDS(rpoC2)             |
|                    | 25330--25354   | 12 | 2.1 | 25330  | LSC,IGS(atpI_atpH)         |
|                    | 31892--31927   | 18 | 2   | 31892  | LSC,IGS(trnT-GGU_psbD)     |
|                    | 41884--41915   | 16 | 2   | 41884  | LSC,IGS(psaA_ycf3)         |
|                    | 51125--51162   | 17 | 2.2 | 51125  | LSC,IGS(ndhC_trnV-UAC)     |
|                    | 52181--52210   | 15 | 2   | 52181  | LSC,IGS(trnV-UAC_trnM-CAU) |
|                    | 59248--59295   | 20 | 2.3 | 59248  | LSC,IGS(accD_psaI)         |
|                    | 68089--68129   | 21 | 2   | 68089  | LSC,CDS(rps18)             |
| <i>A. japonica</i> | 77161--77198   | 19 | 2   | 77161  | LSC,CDS(petD)              |
|                    | 89073--89142   | 21 | 3.3 | 89073  | IRB,CDS(ycf2)              |
|                    | 91469--91510   | 18 | 2.3 | 91469  | IRB,CDS(ycf2)              |
|                    | 107303--107364 | 32 | 1.9 | 107303 | IRB,IGS(rrn4.5_rrn5)       |
|                    | 109409--109444 | 12 | 3   | 109409 | SSC,CDS(ycf1)              |
|                    | 109599--109623 | 9  | 2.8 | 109599 | SSC,CDS(ycf1)              |
|                    | 109587--109644 | 21 | 2.8 | 109587 | SSC,CDS(ycf1)              |
|                    | 110101--110191 | 45 | 2   | 110101 | SSC,CDS(ycf1)              |
|                    | 110249--110292 | 21 | 2.1 | 110249 | SSC,CDS(ycf1)              |
|                    | 112804--112832 | 12 | 2.5 | 112804 | SSC,CDS(ycf1)              |
|                    | 112907--112948 | 21 | 2   | 112907 | SSC,CDS(ycf1)              |
|                    | 113115--113202 | 30 | 2.9 | 113115 | SSC,CDS(ycf1)              |
|                    | 113222--113292 | 30 | 2.6 | 113222 | SSC,CDS(ycf1)              |

|                        |                |    |     |        |                            |
|------------------------|----------------|----|-----|--------|----------------------------|
|                        | 113632--113667 | 18 | 2   | 113632 | SSC,CDS(ycf1)              |
|                        | 125515--125546 | 16 | 2   | 125515 | SSC,IGS(rpl32_ndhF)        |
|                        | 130037--130098 | 32 | 1.9 | 130037 | IRA,IGS(rrm5_rrm4.5)       |
|                        | 145891--145932 | 18 | 2.3 | 145891 | IRA,CDS(ycf2)              |
|                        | 148259--148313 | 21 | 2.6 | 148259 | IRA,CDS(ycf2)              |
|                        | 148276--148328 | 21 | 2.5 | 148276 | IRA,CDS(ycf2)              |
|                        | 3764--3814     | 25 | 2   | 3764   | LSC,tRNA(trnK-UUU)         |
|                        | 12196--12222   | 13 | 2.1 | 12196  | LSC,IGS(trnE-UUC_rpoB)     |
|                        | 12578--12625   | 24 | 2   | 12578  | LSC,IGS(trnE-UUC_rpoB)     |
|                        | 19083--19121   | 18 | 2.2 | 19083  | LSC,IGS(rpoC1_rpoC2)       |
|                        | 21044--21085   | 21 | 2   | 21044  | LSC,CDS(rpoC2)             |
|                        | 25348--25372   | 12 | 2.1 | 25348  | LSC,IGS(atpI_atpH)         |
|                        | 31911--31946   | 18 | 2   | 31911  | LSC,IGS(trnT-GGU_psbD)     |
|                        | 41909--41940   | 16 | 2   | 41909  | LSC,IGS(psaA_ycf3)         |
|                        | 47584--47621   | 18 | 2.1 | 47584  | LSC,IGS(trnL-UAA_trnF-GAA) |
| <i>A. macrocephala</i> | 51153--51190   | 17 | 2.2 | 51153  | LSC,IGS(ndhC_trnV-UAC)     |
|                        | 52213--52242   | 15 | 2   | 52213  | LSC,IGS(trnV-UAC_trnM-CAU) |
|                        | 54973--55004   | 16 | 2   | 54973  | LSC,IGS(atpB_rbcL)         |
|                        | 59295--59342   | 20 | 2.3 | 59295  | LSC,IGS(accD_psaI)         |
|                        | 68142--68182   | 21 | 2   | 68142  | LSC,CDS(rps18)             |
|                        | 77214--77251   | 19 | 2   | 77214  | LSC,CDS(petD)              |
|                        | 89131--89200   | 21 | 3.3 | 89131  | IRB,CDS(ycf2)              |
|                        | 91527--91568   | 18 | 2.3 | 91527  | IRB,CDS(ycf2)              |
|                        | 107367--107428 | 32 | 1.9 | 107367 | IRB,IGS(rrm4.5_rrm5)       |
|                        | 109473--109500 | 12 | 2.3 | 109473 | SSC,CDS(ycf1)              |
|                        | 109659--109701 | 9  | 4.8 | 109659 | SSC,CDS(ycf1)              |

|                |    |     |        |                      |
|----------------|----|-----|--------|----------------------|
| 110174--110264 | 45 | 2   | 110174 | SSC,CDS(ycf1)        |
| 110322--110365 | 21 | 2.1 | 110322 | SSC,CDS(ycf1)        |
| 112877--112905 | 12 | 2.5 | 112877 | SSC,CDS(ycf1)        |
| 112980--113021 | 21 | 2   | 112980 | SSC,CDS(ycf1)        |
| 113188--113275 | 30 | 2.9 | 113188 | SSC,CDS(ycf1)        |
| 113295--113371 | 30 | 2.5 | 113295 | SSC,CDS(ycf1)        |
| 113711--113746 | 18 | 2   | 113711 | SSC,CDS(ycf1)        |
| 125601--125632 | 16 | 2   | 125601 | SSC,IGS(rpl32_ndhF)  |
| 130123--130184 | 32 | 1.9 | 130123 | IRA,IGS(rrn5_rrn4.5) |
| 145983--146024 | 18 | 2.3 | 145983 | IRA,CDS(ycf2)        |
| 148351--148405 | 21 | 2.6 | 148351 | IRA,CDS(ycf2)        |
| 148368--148420 | 21 | 2.5 | 148368 | IRA,CDS(ycf2)        |

**Supplementary Table 9.** The repeats detected in the plastid genomes of *Atractylodes* species.

| Species             | The repeat length of the first part | The starting position of the first part | Matching direction | The repeat length of the second part | The starting position of the second part | E-value  |
|---------------------|-------------------------------------|-----------------------------------------|--------------------|--------------------------------------|------------------------------------------|----------|
| <i>A. chinensis</i> | 52                                  | 46658                                   | P                  | 52                                   | 46658                                    | 3.22E-22 |
|                     | 48                                  | 73398                                   | P                  | 48                                   | 73398                                    | 8.23E-20 |
|                     | 42                                  | 10683                                   | P                  | 42                                   | 10683                                    | 3.37E-16 |
|                     | 42                                  | 43317                                   | P                  | 42                                   | 116658                                   | 3.37E-16 |
|                     | 35                                  | 109154                                  | F                  | 35                                   | 109199                                   | 5.52E-12 |
|                     | 30                                  | 8511                                    | P                  | 30                                   | 45077                                    | 5.66E-09 |
|                     | 30                                  | 112179                                  | F                  | 30                                   | 112209                                   | 5.66E-09 |
|                     | 27                                  | 374                                     | P                  | 27                                   | 407                                      | 3.62E-07 |

---

|    |        |   |    |        |          |
|----|--------|---|----|--------|----------|
| 27 | 112288 | F | 27 | 112318 | 3.62E-07 |
| 26 | 86924  | P | 26 | 86924  | 1.45E-06 |
| 26 | 86924  | F | 26 | 148603 | 1.45E-06 |
| 26 | 148603 | P | 26 | 148603 | 1.45E-06 |
| 25 | 43318  | F | 25 | 97280  | 5.79E-06 |
| 25 | 43318  | P | 25 | 138248 | 5.79E-06 |
| 25 | 88146  | F | 25 | 88167  | 5.79E-06 |
| 25 | 88146  | P | 25 | 147361 | 5.79E-06 |
| 25 | 88167  | P | 25 | 147382 | 5.79E-06 |
| 25 | 97280  | P | 25 | 116674 | 5.79E-06 |
| 25 | 116674 | F | 25 | 138248 | 5.79E-06 |
| 25 | 147361 | F | 25 | 147382 | 5.79E-06 |
| 24 | 66647  | F | 24 | 98450  | 2.32E-05 |
| 24 | 66647  | P | 24 | 137079 | 2.32E-05 |
| 24 | 90527  | F | 24 | 90545  | 2.32E-05 |
| 24 | 90527  | P | 24 | 144984 | 2.32E-05 |
| 24 | 90545  | P | 24 | 145002 | 2.32E-05 |
| 24 | 144984 | F | 24 | 145002 | 2.32E-05 |
| 23 | 35147  | P | 23 | 45019  | 9.27E-05 |
| 23 | 127062 | F | 23 | 127085 | 9.27E-05 |
| 21 | 8517   | F | 21 | 35092  | 1.48E-03 |
| 21 | 35092  | P | 21 | 45080  | 1.48E-03 |
| 21 | 36282  | F | 21 | 65805  | 1.48E-03 |
| 21 | 58288  | F | 21 | 58308  | 1.48E-03 |
| 21 | 79680  | C | 21 | 106725 | 1.48E-03 |
| 21 | 79680  | R | 21 | 128807 | 1.48E-03 |

---

|                   |    |        |   |    |        |          |
|-------------------|----|--------|---|----|--------|----------|
|                   | 21 | 111960 | F | 21 | 111981 | 1.48E-03 |
|                   | 20 | 9251   | P | 20 | 9251   | 5.93E-03 |
|                   | 20 | 21113  | P | 20 | 21113  | 5.93E-03 |
|                   | 20 | 29830  | R | 20 | 29830  | 5.93E-03 |
|                   | 20 | 41897  | F | 20 | 55811  | 5.93E-03 |
|                   | 20 | 47898  | P | 20 | 51135  | 5.93E-03 |
|                   | 20 | 50089  | R | 20 | 50089  | 5.93E-03 |
|                   | 20 | 51136  | P | 20 | 102263 | 5.93E-03 |
|                   | 20 | 51136  | F | 20 | 133270 | 5.93E-03 |
|                   | 19 | 1974   | F | 19 | 46656  | 2.37E-02 |
|                   | 19 | 4442   | F | 19 | 73358  | 2.37E-02 |
|                   | 19 | 30238  | P | 19 | 36059  | 2.37E-02 |
|                   | 19 | 35017  | F | 19 | 40880  | 2.37E-02 |
|                   | 19 | 47898  | F | 19 | 102264 | 2.37E-02 |
|                   | 19 | 47898  | P | 19 | 133270 | 2.37E-02 |
|                   | 48 | 74368  | P | 48 | 74368  | 8.34E-20 |
|                   | 42 | 10693  | P | 42 | 10693  | 3.41E-16 |
|                   | 42 | 43345  | P | 42 | 117613 | 3.41E-16 |
|                   | 35 | 110121 | F | 35 | 110166 | 5.59E-12 |
|                   | 30 | 8520   | P | 30 | 45110  | 5.73E-09 |
| <i>A. koreana</i> | 30 | 113140 | F | 30 | 113170 | 5.73E-09 |
|                   | 27 | 375    | P | 27 | 408    | 3.67E-07 |
|                   | 26 | 87886  | P | 26 | 87886  | 1.47E-06 |
|                   | 26 | 87886  | F | 26 | 149567 | 1.47E-06 |
|                   | 26 | 149567 | P | 26 | 149567 | 1.47E-06 |
|                   | 25 | 43346  | F | 25 | 98242  | 5.87E-06 |

---

|    |        |   |    |        |          |
|----|--------|---|----|--------|----------|
| 25 | 43346  | P | 25 | 139212 | 5.87E-06 |
| 25 | 89108  | F | 25 | 89129  | 5.87E-06 |
| 25 | 89108  | P | 25 | 148325 | 5.87E-06 |
| 25 | 89129  | P | 25 | 148346 | 5.87E-06 |
| 25 | 98242  | P | 25 | 117629 | 5.87E-06 |
| 25 | 117629 | F | 25 | 139212 | 5.87E-06 |
| 25 | 148325 | F | 25 | 148346 | 5.87E-06 |
| 24 | 67617  | F | 24 | 99412  | 2.35E-05 |
| 24 | 67617  | P | 24 | 138043 | 2.35E-05 |
| 24 | 91489  | F | 24 | 91507  | 2.35E-05 |
| 24 | 91489  | P | 24 | 145948 | 2.35E-05 |
| 24 | 91507  | P | 24 | 145966 | 2.35E-05 |
| 24 | 145948 | F | 24 | 145966 | 2.35E-05 |
| 23 | 2005   | R | 23 | 2005   | 9.38E-05 |
| 23 | 35179  | P | 23 | 45052  | 9.38E-05 |
| 22 | 113248 | F | 22 | 113278 | 3.75E-04 |
| 21 | 8526   | F | 21 | 35124  | 1.50E-03 |
| 21 | 19088  | F | 21 | 19106  | 1.50E-03 |
| 21 | 35124  | P | 21 | 45113  | 1.50E-03 |
| 21 | 36310  | F | 21 | 66775  | 1.50E-03 |
| 21 | 51144  | F | 21 | 51161  | 1.50E-03 |
| 21 | 59268  | F | 21 | 59288  | 1.50E-03 |
| 21 | 112927 | F | 21 | 112948 | 1.50E-03 |
| 20 | 9260   | P | 20 | 9260   | 6.01E-03 |
| 20 | 21140  | P | 20 | 21140  | 6.01E-03 |
| 20 | 29855  | R | 20 | 29855  | 6.01E-03 |

---

|                  |    |        |   |    |        |          |
|------------------|----|--------|---|----|--------|----------|
|                  | 20 | 41925  | F | 20 | 56791  | 6.01E-03 |
|                  | 20 | 47920  | P | 20 | 52132  | 6.01E-03 |
|                  | 20 | 50105  | R | 20 | 50105  | 6.01E-03 |
|                  | 20 | 52133  | P | 20 | 103220 | 6.01E-03 |
|                  | 20 | 52133  | F | 20 | 134239 | 6.01E-03 |
|                  | 20 | 80651  | C | 20 | 107684 | 6.01E-03 |
|                  | 20 | 80651  | R | 20 | 129775 | 6.01E-03 |
|                  | 20 | 128036 | F | 20 | 128056 | 6.01E-03 |
|                  | 19 | 4452   | F | 19 | 74328  | 2.40E-02 |
|                  | 19 | 30262  | P | 19 | 36092  | 2.40E-02 |
|                  | 19 | 34958  | P | 19 | 65641  | 2.40E-02 |
|                  | 19 | 35049  | F | 19 | 40908  | 2.40E-02 |
|                  | 48 | 74392  | P | 48 | 74392  | 8.34E-20 |
|                  | 42 | 10715  | P | 42 | 10715  | 3.42E-16 |
|                  | 42 | 43367  | P | 42 | 117643 | 3.42E-16 |
|                  | 35 | 110145 | F | 35 | 110190 | 5.60E-12 |
|                  | 30 | 8519   | P | 30 | 45132  | 5.73E-09 |
|                  | 30 | 113170 | F | 30 | 113200 | 5.73E-09 |
|                  | 27 | 375    | P | 27 | 408    | 3.67E-07 |
| <i>A. lancea</i> | 26 | 87910  | P | 26 | 87910  | 1.47E-06 |
|                  | 26 | 87910  | F | 26 | 149597 | 1.47E-06 |
|                  | 26 | 149597 | P | 26 | 149597 | 1.47E-06 |
|                  | 25 | 43368  | F | 25 | 98266  | 5.87E-06 |
|                  | 25 | 43368  | P | 25 | 139242 | 5.87E-06 |
|                  | 25 | 89132  | F | 25 | 89153  | 5.87E-06 |
|                  | 25 | 89132  | P | 25 | 148355 | 5.87E-06 |



---

|    |        |   |    |        |          |
|----|--------|---|----|--------|----------|
| 25 | 89153  | P | 25 | 148376 | 5.87E-06 |
| 25 | 98266  | P | 25 | 117659 | 5.87E-06 |
| 25 | 117659 | F | 25 | 139242 | 5.87E-06 |
| 25 | 148355 | F | 25 | 148376 | 5.87E-06 |
| 24 | 67641  | F | 24 | 99436  | 2.35E-05 |
| 24 | 67641  | P | 24 | 138073 | 2.35E-05 |
| 24 | 91513  | F | 24 | 91531  | 2.35E-05 |
| 24 | 91513  | P | 24 | 145978 | 2.35E-05 |
| 24 | 91531  | P | 24 | 145996 | 2.35E-05 |
| 24 | 145978 | F | 24 | 145996 | 2.35E-05 |
| 23 | 2004   | R | 23 | 2004   | 9.39E-05 |
| 23 | 9830   | F | 23 | 9853   | 9.39E-05 |
| 23 | 35202  | P | 23 | 45074  | 9.39E-05 |
| 22 | 113278 | F | 22 | 113308 | 3.76E-04 |
| 21 | 8525   | F | 21 | 35147  | 1.50E-03 |
| 21 | 19110  | F | 21 | 19128  | 1.50E-03 |
| 21 | 35147  | P | 21 | 45135  | 1.50E-03 |
| 21 | 36332  | F | 21 | 66799  | 1.50E-03 |
| 21 | 51168  | F | 21 | 51185  | 1.50E-03 |
| 21 | 59292  | F | 21 | 59312  | 1.50E-03 |
| 21 | 112951 | F | 21 | 112972 | 1.50E-03 |
| 20 | 9259   | P | 20 | 9259   | 6.01E-03 |
| 20 | 21162  | P | 20 | 21162  | 6.01E-03 |
| 20 | 29878  | R | 20 | 29878  | 6.01E-03 |
| 20 | 41947  | F | 20 | 56815  | 6.01E-03 |
| 20 | 47944  | P | 20 | 52156  | 6.01E-03 |

---

|                    |    |        |   |    |        |          |
|--------------------|----|--------|---|----|--------|----------|
|                    | 20 | 50129  | R | 20 | 50129  | 6.01E-03 |
|                    | 20 | 52157  | P | 20 | 103244 | 6.01E-03 |
|                    | 20 | 52157  | F | 20 | 134269 | 6.01E-03 |
|                    | 20 | 80675  | C | 20 | 107708 | 6.01E-03 |
|                    | 20 | 80675  | R | 20 | 129805 | 6.01E-03 |
|                    | 20 | 128066 | F | 20 | 128086 | 6.01E-03 |
|                    | 19 | 4451   | F | 19 | 74352  | 2.40E-02 |
|                    | 19 | 30285  | P | 19 | 36114  | 2.40E-02 |
|                    | 19 | 34981  | P | 19 | 65665  | 2.40E-02 |
|                    | 50 | 46667  | P | 50 | 46667  | 5.20E-21 |
|                    | 48 | 74320  | P | 48 | 74320  | 8.32E-20 |
|                    | 42 | 10689  | P | 42 | 10689  | 3.41E-16 |
|                    | 42 | 43323  | P | 42 | 117565 | 3.41E-16 |
|                    | 35 | 110067 | F | 35 | 110112 | 5.59E-12 |
|                    | 30 | 8517   | P | 30 | 45088  | 5.72E-09 |
|                    | 30 | 113092 | F | 30 | 113122 | 5.72E-09 |
|                    | 27 | 375    | P | 27 | 408    | 3.66E-07 |
| <i>A. japonica</i> | 26 | 87841  | P | 26 | 87841  | 1.46E-06 |
|                    | 26 | 87841  | F | 26 | 149473 | 1.46E-06 |
|                    | 26 | 149473 | P | 26 | 149473 | 1.46E-06 |
|                    | 25 | 43324  | F | 25 | 98188  | 5.86E-06 |
|                    | 25 | 43324  | P | 25 | 139127 | 5.86E-06 |
|                    | 25 | 89054  | F | 25 | 89075  | 5.86E-06 |
|                    | 25 | 89054  | P | 25 | 148240 | 5.86E-06 |
|                    | 25 | 89075  | P | 25 | 148261 | 5.86E-06 |
|                    | 25 | 98188  | P | 25 | 117581 | 5.86E-06 |

---

|    |        |   |    |        |          |
|----|--------|---|----|--------|----------|
| 25 | 117581 | F | 25 | 139127 | 5.86E-06 |
| 25 | 148240 | F | 25 | 148261 | 5.86E-06 |
| 24 | 67568  | F | 24 | 99357  | 2.34E-05 |
| 24 | 67568  | P | 24 | 137959 | 2.34E-05 |
| 24 | 91435  | F | 24 | 91453  | 2.34E-05 |
| 24 | 91435  | P | 24 | 145863 | 2.34E-05 |
| 24 | 91453  | P | 24 | 145881 | 2.34E-05 |
| 24 | 145863 | F | 24 | 145881 | 2.34E-05 |
| 23 | 2000   | R | 23 | 2000   | 9.37E-05 |
| 23 | 35158  | P | 23 | 45030  | 9.37E-05 |
| 22 | 113200 | F | 22 | 113230 | 3.75E-04 |
| 21 | 8523   | F | 21 | 35103  | 1.50E-03 |
| 21 | 35103  | P | 21 | 45091  | 1.50E-03 |
| 21 | 36288  | F | 21 | 66726  | 1.50E-03 |
| 21 | 51129  | F | 21 | 51146  | 1.50E-03 |
| 21 | 112873 | F | 21 | 112894 | 1.50E-03 |
| 20 | 9257   | P | 20 | 9257   | 6.00E-03 |
| 20 | 21117  | P | 20 | 21117  | 6.00E-03 |
| 20 | 29835  | R | 20 | 29835  | 6.00E-03 |
| 20 | 41903  | F | 20 | 56775  | 6.00E-03 |
| 20 | 47907  | P | 20 | 52123  | 6.00E-03 |
| 20 | 50092  | R | 20 | 50092  | 6.00E-03 |
| 20 | 50494  | R | 20 | 51472  | 6.00E-03 |
| 20 | 52124  | P | 20 | 103165 | 6.00E-03 |
| 20 | 52124  | F | 20 | 134155 | 6.00E-03 |
| 20 | 80604  | C | 20 | 107630 | 6.00E-03 |

---

|                     |    |        |   |    |        |          |
|---------------------|----|--------|---|----|--------|----------|
|                     | 20 | 80604  | R | 20 | 129690 | 6.00E-03 |
|                     | 19 | 4447   | F | 19 | 74280  | 2.40E-02 |
|                     | 19 | 30241  | P | 19 | 36070  | 2.40E-02 |
|                     | 19 | 35028  | F | 19 | 40886  | 2.40E-02 |
|                     | 19 | 47907  | F | 19 | 103166 | 2.40E-02 |
|                     | 19 | 47907  | P | 19 | 134155 | 2.40E-02 |
|                     | 52 | 46687  | P | 52 | 46687  | 3.26E-22 |
|                     | 48 | 74400  | P | 48 | 74400  | 8.34E-20 |
|                     | 42 | 10696  | P | 42 | 10696  | 3.42E-16 |
|                     | 42 | 43343  | P | 42 | 117677 | 3.42E-16 |
|                     | 35 | 110173 | F | 35 | 110218 | 5.60E-12 |
|                     | 30 | 8517   | P | 30 | 45108  | 5.73E-09 |
|                     | 30 | 113198 | F | 30 | 113228 | 5.73E-09 |
|                     | 27 | 375    | P | 27 | 408    | 3.67E-07 |
|                     | 27 | 113307 | F | 27 | 113337 | 3.67E-07 |
| <i>A.</i>           | 26 | 87923  | P | 26 | 87923  | 1.47E-06 |
| <i>macrocephala</i> | 26 | 87923  | F | 26 | 149601 | 1.47E-06 |
|                     | 26 | 149601 | P | 26 | 149601 | 1.47E-06 |
|                     | 25 | 43344  | F | 25 | 98279  | 5.87E-06 |
|                     | 25 | 43344  | P | 25 | 139246 | 5.87E-06 |
|                     | 25 | 89145  | F | 25 | 89166  | 5.87E-06 |
|                     | 25 | 89145  | P | 25 | 148359 | 5.87E-06 |
|                     | 25 | 89166  | P | 25 | 148380 | 5.87E-06 |
|                     | 25 | 98279  | P | 25 | 117693 | 5.87E-06 |
|                     | 25 | 117693 | F | 25 | 139246 | 5.87E-06 |
|                     | 25 | 148359 | F | 25 | 148380 | 5.87E-06 |

---

|    |        |   |    |        |          |
|----|--------|---|----|--------|----------|
| 24 | 67642  | F | 24 | 99455  | 2.35E-05 |
| 24 | 67642  | P | 24 | 138071 | 2.35E-05 |
| 24 | 91526  | F | 24 | 91544  | 2.35E-05 |
| 24 | 91526  | P | 24 | 145982 | 2.35E-05 |
| 24 | 91544  | P | 24 | 146000 | 2.35E-05 |
| 24 | 145982 | F | 24 | 146000 | 2.35E-05 |
| 23 | 35173  | P | 23 | 45050  | 9.39E-05 |
| 21 | 8523   | F | 21 | 35118  | 1.50E-03 |
| 21 | 19082  | F | 21 | 19100  | 1.50E-03 |
| 21 | 35118  | P | 21 | 45111  | 1.50E-03 |
| 21 | 36308  | F | 21 | 66800  | 1.50E-03 |
| 21 | 51152  | F | 21 | 51169  | 1.50E-03 |
| 21 | 59296  | F | 21 | 59316  | 1.50E-03 |
| 21 | 80686  | C | 21 | 107726 | 1.50E-03 |
| 21 | 80686  | R | 21 | 129803 | 1.50E-03 |
| 21 | 112979 | F | 21 | 113000 | 1.50E-03 |
| 20 | 9257   | P | 20 | 9257   | 6.01E-03 |
| 20 | 21134  | P | 20 | 21134  | 6.01E-03 |
| 20 | 29850  | R | 20 | 29850  | 6.01E-03 |
| 20 | 41923  | F | 20 | 56820  | 6.01E-03 |
| 20 | 47930  | P | 20 | 52144  | 6.01E-03 |
| 20 | 50116  | R | 20 | 50116  | 6.01E-03 |
| 20 | 52145  | P | 20 | 103263 | 6.01E-03 |
| 20 | 52145  | F | 20 | 134267 | 6.01E-03 |
| 19 | 4440   | F | 19 | 74360  | 2.40E-02 |
| 19 | 30256  | P | 19 | 36085  | 2.40E-02 |

---

|    |       |   |    |       |          |
|----|-------|---|----|-------|----------|
| 19 | 34952 | P | 19 | 65666 | 2.40E-02 |
| 19 | 34967 | R | 19 | 34967 | 2.40E-02 |
| 19 | 35043 | F | 19 | 40906 | 2.40E-02 |

**Supplementary Table 10.** Intraspecific heteroplasmic variations found in *Atractylodes* whole plastid genome.

| Sample   | Position | Reference   | Alternative       | Quality |
|----------|----------|-------------|-------------------|---------|
| HPAB0001 | 72515    | G           | A                 | 108     |
| HPAB0006 | 34539    | C           | A                 | 126     |
| HPAB0006 | 37892    | G           | T                 | 225     |
| HPAB0006 | 49175    | CTGAAGATTGA | CTGA              | 29.6821 |
| HPAB0006 | 65446    | A           | C                 | 22.934  |
| HPAB0006 | 72506    | GGCAAA      | GGCAAAGCAAA       | 12.8049 |
| HPAB0006 | 72852    | GCTACT      | G                 | 96      |
| HPAB0006 | 73111    | T           | G                 | 9.32336 |
| HPAB0007 | 32267    | T           | G                 | 196     |
| HPAB0007 | 33324    | T           | C                 | 221     |
| HPAB0007 | 78207    | ATTTTTTTTTT | ATTTTTTTTTTTTTTTT | 175     |

---

|          |        |                 |                                       |         |
|----------|--------|-----------------|---------------------------------------|---------|
| HPAB0011 | 79384  | C               | A                                     | 26.0502 |
| HPAB0016 | 74099  | T               | G                                     | 6.51044 |
| HPAB0016 | 80688  | TTTTACGTATTT    | TTTT                                  | 11.69   |
| HPAB0018 | 109869 | TAAAAAAAAA      | TAAAAAAAAAAAAAAAAA,TAAAAAAAAAAAAAAAAA | 4.42804 |
| HPAB0022 | 107414 | T               | C                                     | 24.6668 |
| HPAB0022 | 130124 | T               | C                                     | 6.62156 |
| HPAB0024 | 794    | A               | C                                     | 59      |
| HPAB0024 | 1252   | A               | C                                     | 6.76493 |
| HPAB0024 | 6221   | GTAAGAATAAGAAT  | GTAAGAAT                              | 156     |
| HPAB0024 | 6424   | T               | G                                     | 77      |
| HPAB0024 | 6871   | AATTTTAATATTTTA | AATTTTA                               | 32.5949 |
| HPAB0024 | 10808  | T               | C                                     | 79      |
| HPAB0024 | 11003  | T               | G                                     | 134     |
| HPAB0024 | 11165  | T               | G                                     | 185     |
| HPAB0024 | 11193  | A               | C                                     | 178     |
| HPAB0024 | 11468  | A               | C                                     | 106     |
| HPAB0024 | 38570  | A               | G                                     | 185     |

---

---

|          |        |                    |             |         |
|----------|--------|--------------------|-------------|---------|
| HPAB0024 | 41512  | G                  | T           | 14.965  |
| HPAB0024 | 41532  | C                  | A           | 38.2342 |
| HPAB0024 | 42995  | AAGCCCAT           | A           | 93      |
| HPAB0024 | 45151  | A                  | C           | 155     |
| HPAB0024 | 45234  | TAATGG             | T           | 184     |
| HPAB0024 | 46710  | C                  | A           | 5.60274 |
| HPAB0024 | 47623  | G                  | A           | 221     |
| HPAB0024 | 48508  | AGAATCCCAATGAATCCC | AGAATCCC    | 108     |
| HPAB0024 | 56843  | A                  | C           | 114     |
| HPAB0024 | 57783  | GAAATA             | GAAATAAAATA | 24.5956 |
| HPAB0024 | 66431  | C                  | T           | 38.8423 |
| HPAB0024 | 83988  | CTATATAT           | CTATATATAT  | 80      |
| HPAB0024 | 109730 | T                  | G           | 29.9462 |
| HPAB0024 | 110366 | C                  | A           | 222     |
| HPAB0024 | 123671 | A                  | C           | 23.9256 |
| HPAB0024 | 127761 | A                  | C           | 188     |
| HPAB0025 | 794    | A                  | C           | 91      |

---



---

|          |        |           |     |         |
|----------|--------|-----------|-----|---------|
| HPAB0025 | 38570  | T         | A,G | 194     |
| HPAB0025 | 43394  | T         | G   | 56      |
| HPAB0025 | 45151  | A         | C   | 46.8757 |
| HPAB0025 | 110366 | C         | A   | 22.7677 |
| HPAB0025 | 127761 | A         | C   | 67      |
| HPAB0026 | 1259   | A         | C   | 77      |
| HPAB0026 | 30886  | C         | A   | 81      |
| HPAB0026 | 77983  | A         | T   | 3.49728 |
| HPAB0027 | 5736   | TTGGATTCT | TT  | 70      |
| HPAB0027 | 11167  | T         | G   | 46.5108 |
| HPAB0027 | 35737  | A         | C   | 6.08067 |
| HPAB0027 | 37885  | G         | T   | 228     |
| HPAB0027 | 41508  | C         | A   | 44.7602 |
| HPAB0027 | 45127  | A         | C   | 20.8999 |
| HPAB0027 | 48356  | A         | G   | 43.2729 |
| HPAB0027 | 65648  | C         | A   | 9.30714 |
| HPAB0027 | 65670  | T         | C   | 47.1668 |

---

|          |        |   |   |     |
|----------|--------|---|---|-----|
| HPAB0027 | 110339 | C | A | 175 |
| HPAB0027 | 127740 | A | C | 134 |

**Supplementary Table 11.** The genes/regions during phylogenetic analysis.

| Location | Category                                    | Number of joint genes | Length of alignment | Gene                                                                                                                                                                                                                                                                                                                                                                                                                                                                                                                                                                                                                                                                                           |
|----------|---------------------------------------------|-----------------------|---------------------|------------------------------------------------------------------------------------------------------------------------------------------------------------------------------------------------------------------------------------------------------------------------------------------------------------------------------------------------------------------------------------------------------------------------------------------------------------------------------------------------------------------------------------------------------------------------------------------------------------------------------------------------------------------------------------------------|
| Nuclear  | nrDNA concatenated sequences                |                       | 5,855               | —                                                                                                                                                                                                                                                                                                                                                                                                                                                                                                                                                                                                                                                                                              |
|          | protein-coding genes                        | 73                    | 61,413              | <i>atpA, atpB, atpE, atpF, atpH, atpI, ccsA, cemA, clpP, infA, matK, ndhA, ndhB, ndhC, ndhD, ndhE, ndhF, ndhG, ndhH, ndhI, ndhJ, ndhK, petA, petB, petD, petL, petN, petG, psaA, psaB, psaI, psaJ, psaC, psbA, psbB, psbC, psbD, psbE, psbF, psbH, psbI, psbJ, psbK, psbM, psbN, psbT, rbcL, rpl14, rpl16, rpl2, rpl20, rpl22, rpl23, rpl32, rpl33, rpl36, rps2, rps3, rps4, rps7, rps8, rps11, rps14, rps15, rps16, rps18, rpoA, rpoB, rpoC1, rpoC2, ycf2, ycf3, ycf4</i>                                                                                                                                                                                                                     |
| Plastid  | all genes (tRNA, rRNA, protein-coding gene) | 95                    | 83,547              | <i>atpA, atpB, atpE, atpF, atpH, atpI, ccsA, cemA, clpP, matK, ndhA, ndhB, ndhC, ndhD, ndhE, ndhF, ndhG, ndhH, ndhI, ndhJ, ndhK, petA, petD, petL, petN, petG, psaA, psaB, psaI, psaJ, psaC, psbA, psbB, psbC, psbD, psbE, psbF, psbH, psbI, psbJ, psbK, psbM, psbN, psbT, rbcL, rpl14, rpl16, rpl2, rpl20, rpl22, rpl23, rpl32, rpl33, rpl36, rps2, rps3, rps4, rps7, rps8, rps11, rps14, rps15, rps16, rps18, rpoA, rpoB, rpoC1, rpoC2, ycf1, ycf2, ycf3, ycf4, rrn5, rrn4.5, rrn23, rrn16, trnC-GCA, trnD-GUC, trnF-GAA, trnH-GUG, trnL-CAA, trnL-UAG, trnN-GUU, trnP-UGG, trnQ-UUG, trnR-ACG, trnR-UCU, trnS-GCU, trnS-GGA, trnS-UGA, trnT-GGU, trnT-UGU, trnV-GAC, trnW-CCA, trnY-GUA</i> |
|          | IGS regions                                 | 88                    | 37,809              | <i>atpA_trnR-UCU, atpE_atpB_rbcL, atpF_atpA, atpH_atpF, atpI_atpH, ccsA_trnL-UAG, cemA_petA,</i>                                                                                                                                                                                                                                                                                                                                                                                                                                                                                                                                                                                               |

|               |    |         |                                                                                                                                                                                                                                                                                                                                                                                                                                                                                                                                                                                                                                                                                                                                                                                                                                                                                                                                                                                                                                                                                                                                                                                                                                                                                                                                                                                                                                                                                                                                                                                                                                                                    |
|---------------|----|---------|--------------------------------------------------------------------------------------------------------------------------------------------------------------------------------------------------------------------------------------------------------------------------------------------------------------------------------------------------------------------------------------------------------------------------------------------------------------------------------------------------------------------------------------------------------------------------------------------------------------------------------------------------------------------------------------------------------------------------------------------------------------------------------------------------------------------------------------------------------------------------------------------------------------------------------------------------------------------------------------------------------------------------------------------------------------------------------------------------------------------------------------------------------------------------------------------------------------------------------------------------------------------------------------------------------------------------------------------------------------------------------------------------------------------------------------------------------------------------------------------------------------------------------------------------------------------------------------------------------------------------------------------------------------------|
|               |    |         | <p><i>clpP_psbB, ndhA_ndhI, ndhB_rps7, ndhB_trnL-CAA, ndhD_ccsA, ndhE_psaC, ndhG_ndhE, ndhI_ndhG, ndhJ_ndhK, petA_psbJ, petD_rpoA, petG_trnW-CCA, petL_petG, petN_psbM, psaA_ycf3, psaB_psaA, psaC_ndhD, psaI_ycf4, psaJ_rpl33, psbA_trnK-UUU_matK, psbD_psbC_trnS-UGA, psbE_petL, psbH_petB, psbI_trnS-GCU, psbJ_psbL, psbK_psbI, psbM_trnD-GUC, psbN_psbH, psbT_psbN, rpl14_rpl16, rpl16_rps3_rpl22, rpl20_clpP, rpl23_trnI-CAU, rpl2_rpl23, rpl32_ndhF_ycf1, rpl33_rps18, rpl36_infA, rpoA_rps11, rpoB_rpoC1, rpoC1_rpoC2, rpoC2_rps2, rps11_rpl36, rps14_psaB, rps15_ndhH, rps16_trnQ-UUG, rps18_rpl20, rps2_atpI, rps3_rpl22_rps19, rps4_trnT-UGU, rps7_ndhB, rps8_rpl14, rrn16_trnV-GAC, rrn4.5_rrn23, rrn4.5_rrn5, rrn5_rrn4.5, trnC-GCA_petN, trnD-GUC_trnY-GUA, trnF-GAA_ndhJ, trnI-M-CAU_rps14, trnH-GUG_psbA, trnI-CAU_rpl23, trnI-CAU_ycf2, trnL-CAA_ndhB, trnL-CAA_ycf2, trnL-UAG_rpl32, trnM-CAU_atpE_atpB, trnN-GUU_trnR-ACG, trnN-GUU_ycf1, trnP-UGG_psaJ, trnQ-UUG_psbK, trnR-UCU_trnG-UCC, trnS-GCU_trnC-GCA, trnS-GGA_rps4, trnT-CGU_psbD_psbC, trnV-GAC_rrn16, trnW-CCA_trnP-TGG, ycf1_rps15, ycf2_trnI-CAU, ycf2_trnL-CAA, ycf3_trnS-GGA, ycf4_cemA</i></p> <p><i>atpA, atpB, atpE, atpF, atpH, atpI, ccsA, cemA, clpP, infA, matK, ndhA, ndhB, ndhC, ndhD, ndhE, ndhF, ndhG, ndhH, ndhI, ndhJ, ndhK, petA, petB, petD, petL, petN, petG, psaA, psaB, psaI, psaJ, psaC, psbA, psbB, psbC, psbD, psbE, psbF, psbH, psbI, psbJ, psbK, psbM, psbN, psbT, rbcL, rpl14, rpl16, rpl2, rpl20, rpl22, rpl23, rpl32, rpl33, rpl36, rps2, rps3, rps4, rps7, rps8, rps11, rps14, rps15, rps16, rps18, rpoA, rpoB, rpoC1, rpoC2, ycf2, ycf3, ycf4</i></p> |
| protein       | 73 | 20,393  |                                                                                                                                                                                                                                                                                                                                                                                                                                                                                                                                                                                                                                                                                                                                                                                                                                                                                                                                                                                                                                                                                                                                                                                                                                                                                                                                                                                                                                                                                                                                                                                                                                                                    |
| whole genomes |    | 121,356 | —                                                                                                                                                                                                                                                                                                                                                                                                                                                                                                                                                                                                                                                                                                                                                                                                                                                                                                                                                                                                                                                                                                                                                                                                                                                                                                                                                                                                                                                                                                                                                                                                                                                                  |

**Supplementary Table 12.** D-statistic (ABBA-BABA) result for testing introgression events in genus *Atractylodes*.

| P1                  | P2                     | P3                     | Dstatistic | Z-score | p-value | f4-ratio | BBAA    | ABBA   | BABA   |
|---------------------|------------------------|------------------------|------------|---------|---------|----------|---------|--------|--------|
| <i>A. chinensis</i> | <i>A. japonica</i>     | <i>A. carlinoides</i>  | 0.1213     | 0.6650  | 0.5060  | 0.0035   | 88.3818 | 1.9606 | 1.5364 |
| <i>A. chinensis</i> | <i>A. koreana</i>      | <i>A. carlinoides</i>  | 0.1448     | 0.9242  | 0.3554  | 0.0052   | 87.7985 | 2.4682 | 1.8439 |
| <i>A. chinensis</i> | <i>A. lancea</i>       | <i>A. carlinoides</i>  | 0.1033     | 0.7820  | 0.4342  | 0.0040   | 87.4309 | 2.5673 | 2.0864 |
| <i>A. chinensis</i> | <i>A. macrocephala</i> | <i>A. carlinoides</i>  | 0.2960     | 1.7652  | 0.0775  | 0.0152   | 83.8697 | 3.9939 | 2.1697 |
| <i>A. japonica</i>  | <i>A. koreana</i>      | <i>A. carlinoides</i>  | 0.0604     | 0.2732  | 0.7847  | 0.0017   | 87.1111 | 1.7556 | 1.5556 |
| <i>A. japonica</i>  | <i>A. lancea</i>       | <i>A. carlinoides</i>  | 0.0175     | 0.1043  | 0.9169  | 0.0005   | 88.8133 | 1.6467 | 1.5900 |
| <i>A. japonica</i>  | <i>A. macrocephala</i> | <i>A. carlinoides</i>  | 0.2877     | 1.3494  | 0.1772  | 0.0117   | 83.4333 | 3.1333 | 1.7333 |
| <i>A. lancea</i>    | <i>A. koreana</i>      | <i>A. carlinoides</i>  | 0.0341     | 0.2064  | 0.8365  | 0.0012   | 87.3117 | 2.1717 | 2.0283 |
| <i>A. koreana</i>   | <i>A. macrocephala</i> | <i>A. carlinoides</i>  | 0.2134     | 0.9382  | 0.3481  | 0.0101   | 84.0222 | 3.4111 | 2.2111 |
| <i>A. lancea</i>    | <i>A. macrocephala</i> | <i>A. carlinoides</i>  | 0.2350     | 1.2544  | 0.2097  | 0.0113   | 83.7200 | 3.5300 | 2.1867 |
| <i>A. chinensis</i> | <i>A. japonica</i>     | <i>A. koreana</i>      | 0.0038     | 0.0309  | 0.9753  | 0.0058   | 4.1914  | 3.3258 | 3.3005 |
| <i>A. lancea</i>    | <i>A. japonica</i>     | <i>A. chinensis</i>    | 0.2380     | 2.3644  | 0.0181  | 0.4437   | 4.7055  | 3.9033 | 2.4024 |
| <i>A. chinensis</i> | <i>A. japonica</i>     | <i>A. macrocephala</i> | 0.1040     | 0.5375  | 0.5909  | 0.0125   | 6.9727  | 2.2515 | 1.8273 |
| <i>A. chinensis</i> | <i>A. koreana</i>      | <i>A. lancea</i>       | 0.0533     | 0.7069  | 0.4796  | 0.1843   | 4.3338  | 4.1435 | 3.7238 |
| <i>A. chinensis</i> | <i>A. koreana</i>      | <i>A. macrocephala</i> | 0.1245     | 1.1982  | 0.2308  | 0.0216   | 6.8399  | 3.3207 | 2.5854 |

|                     |                    |                        |        |        |        |        |        |        |        |
|---------------------|--------------------|------------------------|--------|--------|--------|--------|--------|--------|--------|
| <i>A. chinensis</i> | <i>A. lancea</i>   | <i>A. macrocephala</i> | 0.0556 | 0.4483 | 0.6539 | 0.0092 | 6.3133 | 2.9830 | 2.6688 |
| <i>A. lancea</i>    | <i>A. japonica</i> | <i>A. koreana</i>      | 0.0335 | 0.3295 | 0.7417 | 0.0500 | 4.9972 | 3.3294 | 3.1139 |
| <i>A. japonica</i>  | <i>A. koreana</i>  | <i>A. macrocephala</i> | 0.0633 | 0.3157 | 0.7522 | 0.0093 | 6.1556 | 2.6111 | 2.3000 |
| <i>A. lancea</i>    | <i>A. japonica</i> | <i>A. macrocephala</i> | 0.0288 | 0.1905 | 0.8489 | 0.0033 | 7.4867 | 1.9633 | 1.8533 |
| <i>A. lancea</i>    | <i>A. koreana</i>  | <i>A. macrocephala</i> | 0.0707 | 0.5461 | 0.5850 | 0.0125 | 6.5161 | 3.1872 | 2.7661 |

---
